# Supplementary material for: Heavy metal uptake of nearshore benthic foraminifera during multi-metal culturing experiments
Source: Copernicus journal article supplement (doi:10.5194/bg-19-629-2022), 2022-02-03
Supplement: Supplementary file 1 [file bg-19-629-2022-supplement.zip]

Archive with 4 entries (4 files):
- bg-19-629-2022-supplement-title-page.pdf
- TableS1.pdf
- TableS2.pdf
- TableS3.pdf
