# Supplementary material for: Heavy metal uptake of nearshore benthic foraminifera during multi-metal culturing experiments
Source: Copernicus journal article supplement (doi:10.5194/bg-19-629-2022), 2022-02-03
Supplement: Supplementary file 1 [file bg-19-629-2022-supplement.zip › bg-19-629-2022-supplement-title-page.pdf]

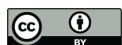

*Supplement of*

## **Heavy metal uptake of nearshore benthic foraminifera during multi-metal culturing experiments**

**Sarina Schmidt et al.**

*Correspondence to:* Sarina Schmidt (sschmidt@geomar.de)

- [bg-19-629-2022-supplement-title-page.pdf](#)
- [TableS1.pdf](#)
- [TableS2.pdf](#)
- [TableS3.pdf](#)

The copyright of individual parts of the supplement might differ from the article licence.
