# Supplementary material for: Heavy metal uptake of nearshore benthic foraminifera during multi-metal culturing experiments
Source: Copernicus journal article supplement (doi:10.5194/bg-19-629-2022), 2022-02-03
Supplement: Supplementary file 1 [file bg-19-629-2022-supplement.zip › TableS1.pdf]

| <i>A. aomoriensis</i> | Phase | Cr/Ca                    | Mn/Ca                  | Ni/Ca                    | Cu/Ca                    | Zn/Ca                    | Ag/Ca                    | Cd/Ca                    | Sn/Ca                    | Hg/Ca                  | Pb/Ca                    |
|-----------------------|-------|--------------------------|------------------------|--------------------------|--------------------------|--------------------------|--------------------------|--------------------------|--------------------------|------------------------|--------------------------|
| Metal System          |       | $\mu\text{mol mol}^{-1}$ | $\text{mmol mol}^{-1}$ | $\mu\text{mol mol}^{-1}$ | $\text{nmol mol}^{-1}$ | $\mu\text{mol mol}^{-1}$ |
| AA0R1F1               | 0     | 13.91                    | 0.00                   | 1.75                     | 7.58                     | 14.56                    | 0.03                     | 4.28                     | 0.23                     | 1.44                   | 0.13                     |
| AA0R2F0               | 0     | 16.18                    | 0.08                   | 2.49                     | 8.72                     | 10.89                    |                          |                          | 0.29                     |                        | 0.55                     |
| AA0R2F1               | 0     | 15.41                    | 0.17                   | 2.53                     | 7.63                     | 14.77                    | 0.01                     |                          | 0.31                     |                        | 0.51                     |
| AA0R4F0               | 0     | 15.65                    | 0.02                   | 7.38                     | 19.83                    | 25.08                    | 0.02                     | 4.69                     | 0.64                     |                        | 0.83                     |
| AA0R4F1               | 0     | 15.86                    | 0.02                   | 8.10                     | 19.30                    | 24.47                    | 0.01                     | 4.91                     | 0.53                     |                        | 0.70                     |
| AA0R5F1               | 0     | 16.21                    | 0.05                   | 6.86                     | 16.71                    | 28.14                    | 0.03                     |                          | 0.89                     | 2.50                   | 2.13                     |
| AA0R5F2               | 0     |                          | 0.09                   |                          |                          | 48.61                    | 0.18                     |                          | 0.92                     | 3.76                   | 1.69                     |
| AA0R5F3               | 0     |                          | 0.12                   | 8.35                     |                          | 49.65                    | 0.10                     | 5.67                     | 1.01                     |                        | 2.02                     |
| AA0R5F4               | 0     | 18.83                    | 0.14                   | 6.68                     | 26.42                    | 51.79                    | 0.27                     |                          | 0.74                     |                        | 1.96                     |
| AA1R1F0               | 1     | 15.12                    | 0.10                   | 2.18                     | 1.37                     | 14.96                    |                          | 3.12                     | 0.16                     | 1.72                   | 0.35                     |
| AA1R1F1               | 1     | 20.68                    | 0.03                   | 2.69                     | 1.71                     | 8.46                     |                          | 6.31                     | 0.47                     | 2.08                   | 0.11                     |
| AA1R1F2               | 1     | 13.38                    | 0.02                   | 1.31                     | 4.31                     | 9.82                     |                          | 3.31                     | 0.35                     | 0.21                   | 0.28                     |
| AA1R1F3               | 1     | 18.60                    | 0.02                   | 2.58                     | 6.03                     | 18.08                    |                          | 5.07                     | 0.77                     | 0.08                   | 0.47                     |
| AA1R1F4               | 1     | 20.04                    | 0.02                   | 1.10                     | 2.54                     | 25.29                    |                          | 7.23                     | 0.90                     | 1.72                   | 0.54                     |
| AA1R1N-0              | 1     | 10.97                    | 0.39                   | 4.65                     | 5.93                     | 10.78                    | 0.04                     | 0.31                     | 0.62                     |                        | 0.47                     |
| AA1R1N-1              | 1     | 11.33                    | 0.14                   | 3.70                     | 4.71                     | 9.23                     | 0.01                     | 0.41                     | 0.44                     |                        | 0.22                     |
| AA1R1N-2              | 1     | 20.32                    | 0.26                   |                          | 11.93                    | 13.58                    | 0.06                     | 1.00                     | 1.04                     |                        | 0.47                     |
| AA1R2F0               | 1     | 10.83                    | 0.49                   | 1.40                     | 4.05                     | 8.41                     |                          | 2.66                     | 0.31                     | 2.64                   | 0.28                     |
| AA1R2F1               | 1     | 10.27                    | 0.68                   | 2.58                     | 5.14                     | 15.45                    | 0.56                     | 2.83                     | 0.37                     | 4.05                   | 0.70                     |
| AA1R2F2               | 1     | 13.19                    | 0.30                   | 3.73                     | 7.60                     | 31.71                    | 0.25                     | 3.61                     | 1.06                     | 0.66                   | 1.09                     |
| AA1R2F3               | 1     | 14.20                    | 0.29                   | 4.49                     | 10.33                    | 43.04                    | 0.20                     | 4.68                     | 1.86                     | 1.37                   | 1.12                     |
| AA1R2F4               | 1     | 21.21                    | 0.22                   | 6.61                     | 8.97                     | 46.29                    | 0.16                     | 8.04                     | 1.89                     | 2.46                   | 0.77                     |
| AA1R2F5               | 1     |                          | 0.20                   | 5.21                     | 5.26                     | 33.25                    |                          | 9.34                     | 1.11                     | 3.85                   | 0.67                     |
| AA1R3F0               | 1     | 9.72                     | 1.51                   | 2.22                     | 2.24                     | 6.17                     |                          | 2.08                     | 0.19                     | 0.99                   | 0.14                     |
| AA1R3F1               | 1     | 12.85                    | 0.50                   | 2.98                     | 3.30                     | 14.13                    |                          | 3.62                     | 0.21                     | 2.50                   | 0.65                     |
| AA1R3F2               | 1     | 11.07                    | 1.93                   | 3.04                     | 4.53                     | 20.30                    | 0.10                     | 2.96                     | 0.36                     | 1.37                   | 1.12                     |
| AA1R3F3               | 1     | 11.82                    |                        | 3.70                     | 6.51                     | 36.10                    | 0.08                     | 3.28                     | 0.48                     | 2.26                   | 1.50                     |
| AA1R3F4               | 1     | 11.26                    |                        | 2.57                     | 4.30                     | 32.87                    |                          | 3.76                     | 0.41                     | 1.44                   | 1.41                     |
| AA1R4F0               | 1     | 16.25                    | 0.07                   | 0.46                     | 0.63                     | 14.65                    |                          | 2.93                     | 0.23                     | 1.21                   | 0.41                     |
| AA1R4F1               | 1     | 15.47                    | 0.39                   | 1.64                     | 4.57                     | 33.93                    | 0.36                     | 3.43                     | 0.83                     | 0.45                   | 1.01                     |
| AA1R4F2               | 1     | 12.47                    | 0.13                   | 0.87                     | 8.33                     | 26.64                    | 0.33                     | 2.69                     | 0.46                     |                        | 1.13                     |
| AA1R4F3               | 1     | 14.32                    | 0.06                   | 0.91                     | 6.78                     | 40.98                    | 0.45                     | 4.02                     | 0.40                     | 1.16                   | 1.22                     |
| AA1R4F4               | 1     | 14.57                    | 0.09                   | 1.89                     | 9.90                     | 72.55                    | 0.48                     | 5.58                     | 1.05                     | 1.24                   | 2.19                     |
| AA1R4F5               | 1     | 9.42                     | 0.06                   | 1.88                     | 5.68                     | 56.27                    | 0.28                     | 4.06                     | 0.87                     | 1.63                   | 1.66                     |
| AA1R4F6               | 1     | 7.93                     | 0.09                   | 3.01                     | 5.10                     | 60.92                    | 0.36                     | 4.34                     | 0.91                     | 2.12                   | 1.73                     |
| AA1R5F0               | 1     | 16.43                    | 0.66                   | 5.28                     | 4.92                     | 10.78                    |                          | 3.29                     | 1.78                     | 0.81                   | 0.64                     |
| AA1R5F1               | 1     | 15.00                    | 0.74                   | 4.03                     | 4.01                     | 14.91                    | 0.07                     | 3.99                     | 0.86                     | 0.11                   | 0.69                     |
| AA1R5F2               | 1     | 16.69                    |                        | 4.17                     |                          |                          | 0.37                     | 5.39                     | 1.94                     |                        | 3.22                     |
| AA1R5F3               | 1     | 17.30                    |                        | 3.50                     | 13.17                    | 39.79                    | 0.55                     | 4.59                     | 0.94                     | 0.56                   | 1.07                     |
| AA1R5F4               | 1     |                          | 1.64                   | 2.69                     | 9.61                     | 49.85                    |                          | 7.91                     | 1.04                     |                        | 1.50                     |
| AA1R6F2               | 1     | 12.17                    | 0.07                   | 2.81                     | 13.99                    | 45.94                    | 0.18                     | 2.14                     | 1.31                     | 2.45                   |                          |
| AA1R6F4               | 1     | 14.42                    | 0.15                   | 6.00                     |                          |                          | 0.47                     | 6.19                     |                          | 3.98                   |                          |
| AA1R6F5               | 1     | 19.21                    | 0.46                   | 5.27                     | 14.29                    | 67.88                    | 0.31                     | 4.73                     |                          | 3.71                   |                          |
| AA1R6F6               | 1     |                          | 0.51                   | 5.03                     | 17.67                    | 93.37                    |                          | 9.91                     |                          | 2.63                   |                          |
| AA1R6F7               | 1     |                          | 0.47                   | 1.83                     | 3.86                     | 33.37                    |                          |                          | 1.72                     |                        | 1.66                     |
| AA1RN2-0              | 1     | 10.00                    | 0.03                   | 1.08                     | 2.24                     | 3.30                     | 0.01                     | 0.24                     | 0.27                     |                        | 0.09                     |
| AA1RN2-1              | 1     | 9.11                     | 0.01                   | 1.26                     | 2.62                     | 6.67                     | 0.01                     | 0.27                     | 0.24                     |                        | 0.19                     |
| AA1RN2-2              | 1     | 9.81                     | 0.01                   | 2.27                     | 3.33                     | 15.80                    | 0.01                     | 0.28                     | 0.28                     |                        | 0.32                     |
| AA2R1F0               | 2     | 10.39                    | 0.04                   | 2.37                     | 3.67                     | 8.19                     | 0.08                     | 2.64                     | 1.68                     |                        | 0.31                     |
| AA2R1F1               | 2     | 9.03                     | 0.02                   | 1.60                     | 2.33                     | 20.25                    | 0.62                     | 3.05                     | 0.50                     |                        | 3.37                     |
| AA2R1F2               | 2     | 11.09                    | 0.02                   | 2.62                     | 3.41                     | 33.78                    |                          | 4.84                     | 0.78                     |                        | 3.03                     |
| AA2R1F3               | 2     | 9.89                     | 0.01                   | 2.06                     | 2.87                     | 41.20                    | 2.18                     | 8.02                     | 0.63                     |                        | 3.97                     |

|          |   |       |      |       |       |       |      |       |      |       |       |
|----------|---|-------|------|-------|-------|-------|------|-------|------|-------|-------|
| AA2R1F4  | 2 |       | 0.02 | 3.56  | 3.34  | 48.79 | 1.40 | 7.83  | 1.07 |       | 4.39  |
| AA2R2F0  | 2 | 10.26 | 0.04 | 6.17  | 6.61  | 16.54 | 0.21 | 3.03  | 1.80 |       | 3.95  |
| AA2R2F1  | 2 | 11.47 |      | 10.59 | 7.70  | 22.27 | 0.34 | 3.55  | 2.39 | 1.37  | 4.03  |
| AA2R2F2  | 2 | 11.60 |      | 6.85  | 5.86  | 18.33 | 0.70 | 4.35  | 2.21 |       | 4.56  |
| AA2R2F3  | 2 | 10.41 | 1.31 | 3.45  | 12.07 | 25.51 | 1.27 | 4.24  | 1.32 |       | 3.14  |
| AA2R3F0  | 2 | 9.49  | 0.03 | 2.59  | 1.90  | 3.82  | 0.08 | 3.40  | 0.32 | 4.24  | 0.21  |
| AA2R3F1  | 2 | 10.29 | 0.13 | 2.49  | 3.14  | 10.97 | 0.12 | 4.66  | 0.55 | 5.71  | 0.71  |
| AA2R3F2  | 2 | 11.13 | 0.25 | 2.21  | 6.47  | 23.84 | 1.41 | 4.78  | 0.57 | 4.78  | 1.31  |
| AA2R3F3  | 2 | 11.71 | 0.30 | 2.20  | 3.24  | 24.02 | 0.67 | 5.86  | 0.55 | 5.23  | 1.18  |
| AA2R3F4  | 2 | 12.94 | 0.13 | 2.90  | 5.02  | 27.43 | 0.39 | 6.79  | 1.30 | 2.19  | 1.36  |
| AA2R3F5  | 2 | 13.75 | 0.17 | 2.21  | 3.07  | 22.73 | 0.38 | 6.44  | 1.00 | 0.53  | 1.19  |
| AA2R4F0  | 2 | 10.15 | 0.06 | 8.05  | 6.00  | 34.51 | 0.46 | 3.05  | 3.96 |       | 8.61  |
| AA2R4F1  | 2 | 12.09 | 0.09 | 11.76 | 8.10  | 38.32 | 0.35 | 7.25  |      |       | 9.51  |
| AA2R4F2  | 2 | 10.10 | 0.18 | 5.01  | 4.32  | 25.45 | 0.11 | 3.18  | 1.52 |       | 4.03  |
| AA2R4F22 | 2 | 10.60 | 0.12 | 5.33  | 4.35  | 30.38 | 0.23 | 5.92  | 1.79 |       | 4.96  |
| AA2R4F3  | 2 | 11.76 | 0.37 | 9.04  | 8.35  | 48.18 | 0.22 | 4.82  | 2.42 |       | 6.86  |
| AA2R4F4  | 2 | 12.85 | 0.48 | 9.96  | 10.23 | 63.47 | 0.25 | 6.09  | 2.65 |       | 8.02  |
| AA2R4F5  | 2 | 10.60 | 0.62 | 10.07 | 11.13 |       | 0.49 | 5.53  | 3.28 | 4.71  | 9.80  |
| AA2R4F6  | 2 | 13.45 | 0.88 |       | 15.16 |       | 0.16 | 4.92  |      | 7.22  |       |
| AA2R5F4  | 2 |       | 0.64 | 4.55  |       | 55.60 |      | 5.25  | 2.63 |       | 9.44  |
| AA2R6F0  | 2 | 9.72  | 0.30 | 7.16  | 7.56  | 36.46 | 1.34 | 9.03  | 1.96 | 32.84 | 7.40  |
| AA2R6F1  | 2 | 11.26 | 0.23 | 7.53  | 7.21  | 29.86 | 0.25 | 5.52  | 2.79 | 11.70 | 5.43  |
| AA2R6F12 | 2 | 10.94 | 0.59 | 8.07  | 10.47 | 43.39 | 0.13 | 6.45  |      | 16.55 | 5.37  |
| AA2R6F2  | 2 | 8.81  | 0.07 | 6.03  | 4.64  | 23.37 | 0.37 | 3.91  | 1.71 | 5.50  | 3.41  |
| AA2R6F3  | 2 | 16.04 | 0.06 |       | 7.97  | 25.68 | 0.48 |       | 1.61 | 19.48 | 1.58  |
| AA2R6F4  | 2 |       | 0.06 | 10.77 | 6.83  | 30.42 | 1.24 |       | 1.92 | 22.73 | 3.07  |
| AA2R6F5  | 2 | 14.91 |      | 5.80  | 6.20  | 40.25 | 0.20 | 8.26  | 1.66 | 7.94  | 3.16  |
| AA2R6F6  | 2 | 13.74 | 1.32 | 7.99  | 6.48  | 50.15 | 0.37 | 12.46 | 1.64 | 9.81  | 5.06  |
| AA2R7F0  | 2 | 8.01  | 0.03 | 3.98  | 3.17  | 18.63 | 0.17 | 3.64  | 0.95 | 3.19  | 1.73  |
| AA2R7F1  | 2 | 8.93  | 0.03 | 2.64  | 2.07  | 10.31 | 0.06 | 5.48  | 0.57 | 6.87  | 1.03  |
| AA2R7F2  | 2 | 9.50  | 0.05 | 5.00  | 3.72  | 15.18 |      | 7.73  | 0.83 | 7.91  | 1.07  |
| AA2R7F3  | 2 | 11.62 | 0.09 | 2.82  | 4.47  | 15.82 |      | 8.31  | 0.58 | 14.56 | 0.76  |
| AA2R7F4  | 2 | 12.15 | 0.15 | 6.96  |       | 57.05 | 1.12 |       | 1.61 |       | 4.27  |
| AA2R8F1  | 2 | 10.65 | 0.08 | 3.66  |       | 30.32 | 0.66 | 2.81  | 4.18 |       | 3.67  |
| AA2R8F2  | 2 | 8.98  | 0.11 | 2.30  | 12.63 | 17.76 | 0.54 | 3.30  | 3.39 |       | 2.15  |
| AA2R8F3  | 2 | 11.29 | 0.08 | 2.78  | 7.84  | 13.98 | 0.62 | 6.50  | 1.98 | 4.00  | 2.55  |
| AA3R4F0  | 3 | 9.65  | 0.99 | 0.92  | 1.74  | 7.56  | 0.21 | 2.89  | 0.12 | 2.92  | 3.52  |
| AA3R4F1  | 3 | 10.07 | 0.22 | 1.21  | 3.66  | 15.67 | 1.80 | 3.86  | 0.13 | 11.51 | 12.18 |
| AA3R4F2  | 3 | 9.75  | 1.27 | 2.97  | 18.11 | 63.03 | 9.97 | 5.04  | 0.40 | 8.03  | 24.05 |
| AA3R4F3  | 3 | 10.22 | 2.27 | 3.12  | 7.88  | 54.82 | 9.85 | 6.08  | 0.46 | 23.34 | 24.73 |
| AA3R5F0  | 3 | 9.30  | 0.67 | 1.31  | 2.05  | 13.99 | 1.14 | 2.58  | 0.17 | 2.51  | 10.33 |
| AA3R5F1  | 3 | 10.57 | 0.72 | 1.72  | 2.52  | 18.61 | 1.75 | 3.55  | 0.26 | 5.32  | 13.41 |
| AA3R5F10 | 3 | 13.41 | 1.71 | 2.50  | 2.67  | 32.98 | 1.60 | 5.98  | 0.42 | 12.69 | 17.25 |
| AA3R5F2  | 3 | 12.74 | 1.80 | 2.69  | 3.92  | 29.94 | 4.22 | 5.52  | 0.72 | 5.58  | 37.55 |
| AA3R5F3  | 3 | 13.31 | 1.64 | 2.36  | 2.88  | 19.02 | 0.97 | 6.26  | 0.53 | 4.67  | 18.93 |
| AA3R5F4  | 3 | 12.97 |      | 3.74  | 4.92  | 33.78 | 5.49 | 6.14  | 0.51 | 7.97  | 23.53 |
| AA3R5F5  | 3 | 14.30 |      | 3.44  | 4.66  | 39.60 | 5.39 | 7.56  | 0.57 | 8.21  | 20.27 |
| AA3R5F6  | 3 | 12.57 | 2.20 | 3.41  | 4.35  | 42.11 | 6.20 | 5.71  | 0.35 | 7.30  | 17.47 |
| AA3R5F7  | 3 | 13.14 | 2.06 | 3.82  | 4.53  | 57.61 | 4.18 | 5.49  | 0.54 | 7.85  | 26.76 |
| AA3R5F8  | 3 | 13.16 | 1.64 | 2.83  | 3.81  | 44.81 | 3.02 | 5.17  | 0.52 | 7.32  | 22.99 |
| AA3R5F9  | 3 | 12.10 | 1.55 | 1.96  | 2.58  | 32.98 | 1.73 | 4.85  | 0.30 | 8.38  | 17.45 |
| AA3R6F0  | 3 | 9.48  | 0.03 | 3.46  | 2.73  | 7.56  | 0.31 | 2.91  | 0.15 |       | 4.39  |
| AA3R6F1  | 3 | 11.82 | 0.17 | 4.74  | 4.11  | 14.32 | 1.11 | 3.12  | 0.41 | 2.46  | 10.12 |
| AA3R6F2  | 3 | 10.19 | 0.87 | 2.72  | 4.70  | 13.78 | 1.13 | 2.94  | 0.22 | 26.78 | 6.84  |
| AA3R6F3  | 3 | 13.12 | 0.81 | 4.54  | 8.35  | 43.22 | 2.31 | 4.89  | 0.36 | 5.86  | 15.19 |
| AA3R6F4  | 3 | 11.02 | 0.61 | 3.69  | 6.01  | 35.74 | 2.22 | 4.69  | 0.59 | 8.24  | 12.51 |

|         |   |       |      |      |       |        |      |       |      |       |       |
|---------|---|-------|------|------|-------|--------|------|-------|------|-------|-------|
| AA3R7F0 | 3 | 13.81 | 0.11 | 3.67 | 4.11  | 64.83  | 0.42 | 5.97  | 0.29 | 6.83  |       |
| AA3R7F1 | 3 | 17.22 | 0.04 | 9.01 | 13.86 | 52.91  | 2.65 | 6.28  | 0.49 | 19.07 | 16.21 |
| AA3R7F2 | 3 |       | 0.18 |      |       |        |      | 9.09  |      |       |       |
| AA3R7F3 | 3 |       | 0.16 |      |       |        |      |       | 2.28 |       |       |
| AA3R7F4 | 3 | 30.18 | 0.29 | 6.38 | 46.86 | 182.23 |      |       | 2.65 | 19.05 | 58.74 |
| AA3R7F5 | 3 |       | 0.26 | 4.91 | 8.05  | 91.76  | 8.76 |       | 0.70 | 6.65  | 50.92 |
| AA3R7F6 | 3 | 22.58 | 0.30 | 4.54 | 6.50  | 57.02  | 5.48 | 10.36 | 0.43 | 13.05 | 29.48 |
| AA3R7F7 | 3 | 32.28 | 0.26 | 5.02 | 7.13  | 59.05  | 4.54 | 11.02 | 0.52 |       | 25.08 |
| AA3R7F8 | 3 | 14.85 | 0.60 | 3.93 | 5.15  | 31.80  | 3.67 | 5.16  | 0.31 | 19.57 | 17.59 |
| AA3R7F9 | 3 | 13.11 | 0.75 | 3.91 | 5.43  | 35.86  | 2.83 | 4.56  | 0.49 | 26.43 | 19.22 |
| AA3R8F0 | 3 | 10.89 | 0.06 | 4.95 | 4.23  | 31.70  | 2.54 | 4.25  | 0.46 | 4.63  | 25.75 |
| AA3R8F1 | 3 | 11.04 | 0.16 | 4.36 | 4.08  | 27.86  | 1.04 | 4.05  | 0.41 | 8.18  | 23.14 |
| AA3R8F2 | 3 | 12.07 | 0.26 | 4.48 | 4.92  | 41.54  | 4.51 | 4.85  | 0.51 | 10.01 | 30.90 |
| AA3R8F3 | 3 | 12.39 | 0.26 | 6.55 | 6.07  | 53.82  | 4.47 | 5.51  | 0.60 | 10.74 | 40.06 |
| AA3R8F4 | 3 | 13.15 | 0.61 | 6.14 | 10.75 | 69.07  | 3.63 | 5.17  | 0.58 | 11.41 | 19.79 |
| AA3R8F4 | 3 | 15.73 | 0.31 | 8.58 | 8.48  | 74.16  | 4.71 | 6.80  | 0.87 | 13.19 | 56.84 |

#### Control System

|         |   |       |      |       |       |        |      |       |      |      |      |
|---------|---|-------|------|-------|-------|--------|------|-------|------|------|------|
| AA0L1F0 | 0 | 12.58 | 0.07 | 0.32  | 1.76  | 12.32  |      | 4.93  |      | 0.95 | 0.41 |
| AA0L1F1 | 0 | 12.08 | 0.10 | 0.57  | 2.58  | 35.50  |      | 4.86  |      | 1.18 | 0.83 |
| AA0L1F2 | 0 | 10.49 | 0.27 | 1.77  | 11.63 | 120.41 | 0.17 | 5.29  | 0.38 | 1.75 | 2.17 |
| AA0L1F3 | 0 | 14.62 | 0.39 | 1.87  | 12.77 | 146.06 | 0.27 | 8.84  | 0.25 | 2.41 | 2.09 |
| AA0L2F2 | 0 | 33.18 | 0.07 | 0.93  | 5.99  | 39.73  | 0.10 | 6.92  |      |      | 1.10 |
| AA0L3F0 | 0 | 28.18 | 0.05 | 0.97  | 2.81  | 20.39  | 0.00 | 7.99  |      | 0.11 | 0.59 |
| AA0L3F1 | 0 | 29.48 | 0.05 | 0.90  | 2.75  | 14.39  |      | 8.18  |      | 0.17 | 0.29 |
| AA0L3F3 | 0 | 59.80 | 0.04 | 0.79  | 1.90  | 83.93  | 0.08 | 16.94 |      | 0.40 | 2.35 |
| AA0L4F4 | 0 |       |      |       |       |        |      |       |      |      |      |
| AA0L5F0 | 0 | 11.55 | 0.09 | 0.38  | 1.50  | 17.13  | 0.01 | 3.85  | 0.05 | 0.90 | 0.72 |
| AA0L5F1 | 0 | 11.84 | 0.09 | 0.60  | 2.54  | 38.70  | 0.06 | 4.32  |      | 0.60 | 0.94 |
| AA0L5F2 | 0 | 11.01 | 0.04 | 0.41  | 1.64  | 9.87   | 0.01 | 4.19  | 0.00 | 0.37 | 0.30 |
| AA0L5F3 | 0 | 13.05 | 0.05 | 0.62  | 2.77  | 17.92  | 0.05 | 4.98  |      | 1.12 | 0.41 |
| AA0L6F0 | 0 | 13.65 | 0.09 | 2.22  | 6.39  | 42.05  | 0.14 | 6.97  | 0.22 | 0.70 | 0.98 |
| AA0L6F1 | 0 | 13.14 | 0.11 | 3.35  | 9.03  | 53.03  | 0.30 | 6.88  | 0.31 | 1.44 | 1.95 |
| AA0L6F2 | 0 | 15.44 | 0.12 | 3.08  | 11.67 | 79.97  | 0.64 | 10.33 | 0.31 | 1.64 | 2.52 |
| AA0L6F3 | 0 | 14.22 | 0.14 | 3.87  | 12.66 | 131.77 | 0.53 | 15.32 | 0.52 | 4.48 | 4.25 |
| AA0L7F1 | 0 | 13.28 | 0.07 | 0.85  | 6.71  | 39.22  | 0.27 | 4.02  | 0.33 |      | 0.66 |
| AA0L7F2 | 0 | 11.39 | 0.08 | 0.62  | 2.45  | 36.86  | 0.17 | 3.07  | 0.21 |      | 0.48 |
| AA0L7F3 | 0 | 13.74 | 0.07 | 0.69  | 3.64  | 36.06  | 0.21 | 4.45  | 0.34 |      | 0.49 |
| AA0L7F4 | 0 | 15.95 | 0.06 | 0.42  | 2.43  | 37.02  | 0.30 | 6.60  | 0.25 |      | 0.49 |
| AA0L7F5 | 0 | 31.92 | 0.13 | 2.47  | 12.82 | 104.75 | 1.57 | 20.42 | 1.10 |      | 1.91 |
| AA1L1F2 | 1 | 12.06 | 0.24 | 6.35  | 8.00  | 37.16  | 0.09 | 3.00  | 1.15 | 1.68 | 1.39 |
| AA1L2F0 | 1 | 11.77 | 0.06 | 2.40  | 4.34  | 17.27  |      | 2.43  | 1.03 | 2.12 | 0.41 |
| AA1L2F1 | 1 | 11.93 | 0.04 | 2.93  | 6.16  | 21.73  | 0.47 | 2.54  | 0.89 | 1.92 | 1.18 |
| AA1L2F2 | 1 | 11.35 | 0.06 | 3.65  | 9.38  | 34.77  | 0.34 | 2.63  | 1.33 | 1.48 | 1.76 |
| AA1L2F3 | 1 | 13.21 | 0.13 | 6.31  | 18.03 | 73.96  | 0.39 | 3.79  | 2.24 | 3.54 |      |
| AA1L3F0 | 1 | 18.65 |      | 3.80  | 3.93  | 20.97  |      |       | 1.30 | 2.86 | 0.60 |
| AA1L3F1 | 1 | 9.18  | 1.60 | 5.48  | 5.80  | 15.15  |      | 4.05  | 1.12 |      | 0.65 |
| AA1L3F2 | 1 | 9.00  | 1.16 | 3.30  | 3.51  | 11.31  |      | 4.30  | 0.65 | 0.89 | 0.46 |
| AA1L3F3 | 1 | 9.75  | 0.73 | 5.22  | 4.73  | 11.81  |      | 4.37  | 0.46 | 1.54 | 0.41 |
| AA1L4F1 | 1 | 11.34 | 0.21 | 3.30  | 5.14  | 24.40  | 0.05 | 3.02  | 0.52 | 3.29 | 0.52 |
| AA1L4F2 | 1 | 12.75 | 0.22 | 4.80  | 10.67 | 35.72  | 0.29 | 3.65  | 0.80 | 2.91 | 1.17 |
| AA1L5F0 | 1 |       | 0.47 | 9.63  | 10.88 | 34.32  |      | 5.16  | 2.46 | 3.78 | 0.91 |
| AA1L5F1 | 1 | 13.51 | 1.17 | 11.96 | 13.97 | 66.34  | 0.12 | 2.77  | 3.11 | 4.24 | 1.56 |
| AA1L5F2 | 1 | 14.82 | 0.65 | 13.84 | 15.51 | 51.00  | 0.42 | 4.31  | 5.56 | 9.97 | 2.04 |
| AA1L5F3 | 1 | 16.11 | 1.51 |       |       |        | 0.30 | 8.00  |      |      | 2.84 |
| AA1L6F0 | 1 | 10.61 | 0.07 | 4.91  | 5.22  | 17.12  | 0.08 | 2.64  | 0.50 |      | 0.49 |
| AA1L6F1 | 1 | 15.40 | 0.17 | 4.96  | 9.21  | 39.46  | 0.57 | 3.94  | 2.55 |      | 1.04 |

|                                  |   |       |      |       |       |        |      |      |      |       |      |
|----------------------------------|---|-------|------|-------|-------|--------|------|------|------|-------|------|
| AA1L6F2                          | 1 | 12.69 | 0.51 | 6.62  | 11.89 | 68.27  |      | 3.77 | 1.59 | 0.72  | 1.86 |
| AA2L1F0                          | 2 | 11.30 | 0.03 | 2.29  | 5.49  | 18.69  | 0.43 | 2.80 | 0.42 | 0.89  | 1.47 |
| AA2L1F1                          | 2 | 14.43 | 0.47 | 2.37  | 3.47  | 9.28   |      | 4.45 | 0.15 | 2.45  | 0.29 |
| AA2L1F2                          | 2 | 14.85 | 0.40 |       | 5.51  | 16.43  | 0.22 | 4.73 | 0.30 | 2.39  | 0.94 |
| AA2L1F3                          | 2 | 15.18 |      | 3.29  | 4.95  | 22.24  | 0.38 | 5.07 | 0.30 | 1.57  | 1.12 |
| AA2L2F0                          | 2 | 10.83 | 0.02 | 1.69  | 3.57  | 28.70  | 0.05 | 2.74 | 0.39 | 0.14  | 0.77 |
| AA2L2F1                          | 2 | 15.92 | 0.01 | 2.21  | 2.84  | 33.20  | 0.04 | 3.30 | 0.14 | 0.98  | 1.48 |
| AA2L2F2                          | 2 | 17.67 | 0.01 | 3.20  | 3.52  | 33.96  |      |      | 0.10 |       | 1.21 |
| AA2L3F0                          | 2 | 11.86 | 0.05 | 2.55  | 2.55  | 7.28   |      | 2.50 |      |       | 0.10 |
| AA2L3F1                          | 2 | 11.07 | 0.71 | 2.51  | 5.32  | 24.93  | 0.17 | 3.09 | 0.02 | 0.53  | 1.27 |
| AA2L3F12                         | 2 | 10.26 | 0.15 | 1.39  | 2.11  | 11.32  | 0.03 | 2.52 | 0.06 |       | 0.22 |
| AA2L3F2                          | 2 | 10.30 | 0.79 | 2.16  | 3.20  | 14.92  | 0.08 | 3.39 | 0.01 | 0.58  | 0.58 |
| AA2L4F0                          | 2 | 13.53 | 0.43 | 1.32  | 3.02  | 8.93   | 0.21 | 3.64 | 0.37 | 0.76  | 0.42 |
| AA2L4F1                          | 2 | 14.97 | 0.72 | 1.57  | 3.86  | 14.00  | 0.06 | 3.98 | 0.40 | 3.04  | 0.77 |
| AA2L4F2                          | 2 | 14.99 | 0.47 | 1.23  | 3.56  | 11.59  |      | 4.39 | 0.20 | 1.12  | 0.34 |
| AA2L5F0                          | 2 | 15.22 | 0.03 | 2.45  | 3.37  | 19.53  |      | 3.76 | 0.20 |       | 0.89 |
| AA2L5F1                          | 2 | 13.14 | 0.03 | 1.46  | 2.47  | 19.71  |      | 3.32 | 0.18 | 0.75  | 0.98 |
| AA2L5F2                          | 2 | 15.01 | 0.05 | 1.77  | 3.19  | 22.17  | 0.06 | 3.94 | 0.14 | 0.45  | 0.93 |
| AA3L1F0                          | 3 | 8.88  | 0.45 | 3.27  | 3.68  | 13.41  | 0.15 | 2.26 | 0.14 |       | 0.41 |
| AA3L1F1                          | 3 | 10.08 | 0.35 | 3.69  | 5.75  | 22.99  | 0.21 | 3.03 | 0.22 |       | 1.05 |
| AA3L1F2                          | 3 | 13.63 | 0.12 | 5.60  | 13.77 | 41.07  | 1.50 | 5.44 | 0.25 | 0.90  | 1.71 |
| AA3L2F0                          | 3 | 8.24  |      | 3.24  | 2.72  | 7.86   | 0.08 | 2.57 | 0.04 |       | 0.25 |
| AA3L2F1                          | 3 | 9.31  | 0.48 | 3.73  | 2.94  | 10.11  | 0.09 | 2.88 | 0.07 |       | 0.41 |
| AA3L2F2                          | 3 | 8.08  | 0.75 | 3.84  | 2.61  | 9.16   | 0.03 | 2.36 | 0.07 |       | 0.39 |
| AA3L2F3                          | 3 | 9.30  | 0.71 | 4.73  | 3.50  | 12.67  | 0.04 | 3.56 | 0.09 |       | 0.43 |
| AA3L2F4                          | 3 | 8.56  | 0.45 | 3.91  | 6.30  | 19.62  | 0.13 | 3.22 | 0.08 |       | 1.09 |
| AA3L3F0                          | 3 | 19.74 | 0.38 | 10.63 | 8.07  | 40.48  | 0.12 |      | 0.25 |       | 1.72 |
| AA3L3F1                          | 3 | 11.88 | 0.22 | 6.78  | 7.76  | 34.20  | 0.12 | 3.01 | 0.27 | 3.63  | 1.97 |
| AA3L3F2                          | 3 | 8.97  | 0.40 | 5.90  | 5.70  | 23.20  | 0.10 | 2.27 | 0.26 | 2.83  | 2.24 |
| AA3L3F3                          | 3 | 10.97 | 0.84 | 7.56  | 20.98 | 92.34  | 0.85 | 3.18 | 0.24 | 0.72  | 6.23 |
| AA3L3F4                          | 3 | 13.25 | 0.52 | 10.54 | 39.89 | 107.75 | 0.91 | 2.95 | 0.40 |       | 6.67 |
| AA3L4F1                          | 3 |       | 0.12 |       |       |        |      |      |      |       |      |
| AA3L4F2                          | 3 | 7.88  | 0.02 | 0.66  | 2.69  | 17.75  |      | 2.05 | 0.08 | 7.70  | 0.34 |
| AA3L4F3                          | 3 | 9.32  | 0.01 | 1.02  | 3.87  | 28.69  |      | 2.46 | 0.07 | 6.91  | 0.61 |
| AA3L4F4                          | 3 | 8.48  | 0.02 | 1.98  | 3.15  | 41.64  | 0.06 | 3.43 | 0.06 | 12.44 | 0.94 |
| AA3L5F1                          | 3 | 7.94  | 0.13 | 1.12  | 3.17  | 5.80   | 0.33 | 1.68 | 0.30 | 6.07  | 0.53 |
| AA3L5F2                          | 3 | 9.78  | 0.90 | 1.18  | 6.71  | 11.00  |      | 3.01 | 0.28 | 12.97 | 0.23 |
| AA3L5F3                          | 3 | 9.41  | 1.34 | 1.95  | 10.86 | 20.98  |      | 2.65 | 0.44 | 11.13 | 0.26 |
| <b>Number of rejected points</b> |   | 15    | 13   | 10    | 12    | 9      | 45   | 17   | 19   | 63    | 11   |
