# Supplementary material for: Heavy metal uptake of nearshore benthic foraminifera during multi-metal culturing experiments
Source: Copernicus journal article supplement (doi:10.5194/bg-19-629-2022), 2022-02-03
Supplement: Supplementary file 1 [file bg-19-629-2022-supplement.zip › TableS2.pdf]

| <i>A. batava</i> | Phase | Cr/Ca                    | Mn/Ca                  | Ni/Ca                    | Cu/Ca                    | Zn/Ca                    | Ag/Ca                    | Cd/Ca                    | Sn/Ca                    | Hg/Ca                  | Pb/Ca                    |
|------------------|-------|--------------------------|------------------------|--------------------------|--------------------------|--------------------------|--------------------------|--------------------------|--------------------------|------------------------|--------------------------|
| Metal System     |       | $\mu\text{mol mol}^{-1}$ | $\text{mmol mol}^{-1}$ | $\mu\text{mol mol}^{-1}$ | $\text{nmol mol}^{-1}$ | $\mu\text{mol mol}^{-1}$ |
| AB0R1F3          | 0     | 13.3                     | 0.1                    | 0.6                      | 4.2                      | 55.6                     | 0.019                    | 5.7                      | 0.10                     | 1.38                   | 1.2                      |
| AB0R1F4          | 0     | 16.6                     | 0.1                    | 1.0                      | 7.3                      | 72.3                     | 0.054                    | 5.7                      | 0.15                     | 0.46                   | 1.4                      |
| AB0R1F5          | 0     | 16.8                     | 0.1                    | 1.1                      | 5.7                      | 92.9                     |                          | 6.6                      | 0.22                     | 0.74                   |                          |
| AB0R1F5.2        | 0     | 16.0                     | 0.0                    | 1.1                      | 7.0                      | 60.1                     | 0.028                    | 6.7                      | 0.09                     | 0.74                   | 1.1                      |
| AB0R1F6          | 0     | 19.1                     | 0.1                    | 1.5                      | 14.5                     | 98.3                     | 0.040                    |                          | 0.36                     | 0.76                   | 1.6                      |
| AB0R2F1          | 0     | 17.0                     |                        |                          |                          | 28.5                     | 0.184                    | 6.4                      |                          | 1.90                   | 1.1                      |
| AB1R1F0          | 1     | 10.1                     | 0.0                    | 0.9                      | 1.2                      | 2.1                      |                          | 2.2                      | 0.22                     |                        | 0.1                      |
| AB1R1F1          | 1     | 11.3                     | 0.0                    | 0.5                      | 0.8                      | 4.2                      |                          | 2.3                      | 0.20                     | 0.18                   | 0.2                      |
| AB1R1F2          | 1     | 12.9                     | 0.0                    | 1.1                      | 9.9                      | 40.5                     | 0.072                    | 2.7                      | 0.66                     |                        | 1.3                      |
| AB1R1F3          | 1     | 14.0                     | 0.0                    | 3.1                      |                          | 88.0                     | 0.295                    | 2.3                      |                          |                        |                          |
| AB1R1F4          | 1     | 15.7                     | 0.0                    | 1.9                      | 5.5                      | 27.4                     | 0.111                    | 3.8                      | 0.61                     | 1.39                   | 1.1                      |
| AB1R2F1          | 1     | 12.6                     | 0.1                    | 3.5                      | 2.9                      | 15.0                     |                          | 3.1                      | 1.25                     |                        | 0.3                      |
| AB1R2F2          | 1     |                          | 0.1                    | 2.0                      | 2.2                      | 25.7                     |                          |                          | 0.31                     |                        | 0.6                      |
| AB1R3F0          | 1     | 13.4                     | 0.1                    | 1.8                      | 2.1                      | 18.0                     | 0.011                    | 2.4                      | 0.19                     |                        | 0.4                      |
| AB1R3F1          | 1     | 12.2                     | 0.1                    | 1.5                      | 1.1                      | 22.3                     |                          | 2.4                      | 0.27                     |                        | 0.3                      |
| AB1R3F2          | 1     | 16.2                     | 0.0                    | 2.8                      | 1.7                      | 18.7                     |                          | 3.6                      | 0.39                     |                        | 0.3                      |
| AB1R4F1          | 1     | 14.8                     | 0.1                    | 2.6                      | 3.5                      | 33.5                     |                          | 2.8                      | 1.12                     |                        | 0.7                      |
| AB1R4F2          | 1     | 20.7                     | 0.1                    | 3.2                      | 3.6                      | 29.2                     |                          | 4.1                      | 1.75                     |                        | 0.5                      |
| AB1R5F1          | 1     | 20.5                     | 0.1                    | 2.9                      | 2.5                      | 20.5                     |                          | 3.5                      | 0.86                     |                        | 0.4                      |
| AB1R6F0          | 1     | 15.7                     | 0.1                    | 1.0                      | 1.4                      | 15.3                     |                          | 3.9                      | 0.41                     |                        | 0.4                      |
| AB1R6F1          | 1     | 20.5                     | 0.0                    | 1.8                      | 1.4                      | 28.0                     |                          |                          | 0.32                     |                        | 0.4                      |
| AB1R6F12         | 1     | 7.9                      | 0.0                    | 0.3                      | 1.5                      | 9.6                      | 0.035                    | 2.1                      | 0.19                     |                        | 0.2                      |
| AB1R6F2          | 1     | 24.4                     | 0.0                    | 1.4                      | 1.9                      | 28.6                     |                          | 5.4                      | 0.68                     |                        | 0.3                      |
| AB2R10F0         | 2     | 7.8                      | 0.0                    | 2.2                      |                          | 9.3                      | 0.037                    | 1.9                      | 0.22                     | 1.28                   | 0.4                      |
| AB2R10F1         | 2     | 11.9                     | 0.0                    | 3.6                      |                          | 12.6                     |                          | 3.5                      | 0.27                     | 2.84                   | 0.6                      |
| AB2R10F2         | 2     | 9.2                      | 0.0                    | 3.2                      | 41.9                     | 8.1                      |                          | 2.3                      | 0.35                     | 0.32                   | 0.5                      |
| AB2R10F3         | 2     | 10.2                     | 0.0                    | 3.1                      | 37.2                     | 11.3                     |                          | 2.5                      | 0.27                     |                        | 0.5                      |
| AB2R1F0          | 2     | 9.7                      | 0.0                    | 0.6                      | 1.0                      | 1.8                      |                          | 2.3                      | 0.22                     |                        | 0.1                      |
| AB2R1F1          | 2     | 9.9                      | 0.0                    | 0.9                      | 1.6                      | 5.5                      |                          | 2.5                      | 0.33                     |                        | 0.2                      |
| AB2R1F2          | 2     | 9.4                      | 0.0                    | 1.1                      | 4.8                      | 10.2                     | 0.124                    | 2.8                      | 0.36                     |                        | 0.3                      |
| AB2R1F3          | 2     | 10.6                     | 0.0                    | 1.3                      | 5.4                      | 14.6                     | 0.136                    | 3.3                      | 0.35                     |                        | 0.4                      |
| AB2R1F4          | 2     | 10.0                     | 0.0                    | 1.6                      | 3.4                      | 15.3                     | 0.040                    | 3.5                      | 0.38                     |                        | 0.3                      |
| AB2R2F0          | 2     | 8.4                      | 0.0                    | 1.5                      | 1.9                      | 3.5                      |                          | 2.1                      | 0.48                     |                        | 0.2                      |
| AB2R2F1          | 2     | 8.5                      | 0.0                    | 1.8                      | 2.1                      | 5.3                      | 0.029                    | 1.9                      | 0.39                     |                        | 0.2                      |
| AB2R2F2          | 2     | 9.2                      | 0.0                    | 2.2                      | 2.6                      | 11.9                     | 0.177                    | 2.4                      | 0.61                     |                        | 0.3                      |
| AB2R2F3          | 2     | 9.6                      | 0.0                    | 3.0                      | 6.0                      | 16.9                     | 0.371                    | 3.7                      | 0.90                     |                        | 0.4                      |
| AB2R2F4          | 2     | 9.9                      | 0.0                    | 2.5                      | 3.1                      | 12.3                     | 0.119                    | 3.8                      | 0.55                     |                        | 0.3                      |
| AB2R2F5          | 2     | 10.4                     | 0.0                    | 2.1                      | 2.9                      | 12.7                     | 0.051                    | 4.6                      | 0.46                     |                        | 0.2                      |
| AB2R2F6          | 2     | 12.0                     | 0.0                    | 1.9                      | 2.6                      | 13.5                     | 0.036                    |                          | 0.78                     |                        | 0.3                      |
| AB2R3F1          | 2     | 9.9                      | 0.0                    | 0.8                      | 1.1                      | 10.7                     |                          | 2.9                      | 0.53                     | 9.13                   | 0.9                      |
| AB2R3F2          | 2     | 9.8                      | 0.0                    | 0.8                      | 4.1                      | 15.8                     | 0.068                    | 2.8                      | 0.34                     | 9.65                   | 0.8                      |
| AB2R3F3          | 2     | 9.6                      | 0.0                    | 1.0                      | 5.1                      | 26.4                     | 0.136                    | 2.8                      | 0.73                     | 5.83                   | 1.4                      |
| AB2R4F10         | 2     | 9.8                      |                        | 2.8                      | 9.1                      |                          |                          |                          |                          |                        |                          |
| AB2R4F11         | 2     | 10.4                     | 0.0                    | 1.4                      | 3.3                      | 20.3                     | 0.638                    | 5.8                      | 0.56                     |                        | 1.3                      |
| AB2R4F12         | 2     | 8.0                      | 0.0                    | 1.1                      | 1.4                      | 8.4                      | 0.253                    | 5.8                      | 0.28                     |                        | 0.4                      |
| AB2R4F2          | 2     | 6.7                      | 0.0                    | 0.6                      | 1.1                      | 6.0                      |                          | 2.7                      | 0.47                     |                        | 0.8                      |
| AB2R4F3          | 2     | 7.0                      | 0.0                    | 0.7                      | 2.8                      | 18.4                     | 0.088                    | 2.6                      | 0.48                     |                        | 0.7                      |
| AB2R4F4          | 2     | 7.1                      | 0.0                    | 1.4                      | 3.1                      | 23.8                     | 0.088                    | 2.9                      | 0.51                     |                        | 0.9                      |
| AB2R4F5          | 2     | 8.3                      | 0.0                    | 2.7                      | 20.5                     |                          | 0.657                    | 3.9                      |                          |                        |                          |
| AB2R4F6          | 2     | 6.1                      | 0.0                    |                          | 8.2                      | 34.7                     | 0.273                    | 5.3                      | 1.91                     |                        |                          |
| AB2R4F7          | 2     | 7.2                      | 0.0                    |                          | 6.7                      | 26.1                     | 0.099                    | 3.9                      |                          |                        | 1.2                      |
| AB2R4F8          | 2     | 9.0                      | 0.0                    | 3.4                      | 5.1                      | 23.5                     | 0.301                    | 2.9                      | 1.74                     |                        | 1.2                      |

|          |   |      |     |     |      |      |       |      |      |       |      |
|----------|---|------|-----|-----|------|------|-------|------|------|-------|------|
| AB2R4F9  | 2 | 12.2 | 0.0 | 2.8 | 8.3  | 33.2 | 0.439 | 2.6  |      |       | 1.0  |
| AB2R5F1  | 2 | 10.5 | 0.0 | 2.0 | 5.5  | 13.4 |       | 2.6  | 1.03 | 5.04  | 0.9  |
| AB2R5F2  | 2 | 10.1 | 0.0 | 1.3 | 1.7  | 5.1  | 0.139 | 2.4  | 0.29 | 17.58 | 0.3  |
| AB2R5F3  | 2 | 10.8 | 0.0 | 1.9 | 2.9  | 11.3 | 0.084 | 2.9  | 0.56 |       | 0.4  |
| AB2R6F0  | 2 | 8.8  | 0.0 | 0.7 | 1.1  | 3.2  |       | 2.2  | 0.28 | 1.01  | 0.2  |
| AB2R6F1  | 2 | 9.8  | 0.0 | 0.9 | 1.3  | 6.6  |       | 2.5  | 0.27 | 0.50  | 0.2  |
| AB2R6F2  | 2 | 9.6  | 0.0 | 0.7 | 3.3  | 17.1 | 0.033 | 2.9  | 0.33 |       | 0.3  |
| AB2R6F3  | 2 | 12.0 | 0.0 | 1.2 | 2.2  | 22.7 | 0.024 | 3.6  | 0.49 |       | 0.4  |
| AB2R6F4  | 2 | 13.1 | 0.0 | 1.3 | 1.8  | 22.4 | 0.095 | 4.3  | 0.56 |       | 0.4  |
| AB2R6F5  | 2 | 14.0 | 0.0 | 1.8 | 2.2  | 28.4 |       | 4.9  | 0.47 |       | 0.5  |
| AB2R6F6  | 2 | 12.6 | 0.0 | 1.6 | 2.3  | 25.0 |       | 4.2  | 0.54 |       | 0.4  |
| AB2R7F0  | 2 | 13.7 | 0.0 | 2.4 | 2.6  | 4.5  | 0.125 | 3.5  | 0.14 | 7.29  | 0.4  |
| AB2R7F1  | 2 | 9.6  | 0.0 | 0.7 | 1.5  | 4.5  |       | 2.2  | 0.17 | 2.04  | 0.2  |
| AB2R7F2  | 2 | 10.5 | 0.0 | 0.7 | 0.9  | 4.3  |       | 2.7  | 0.11 | 3.39  | 0.1  |
| AB2R7F3  | 2 | 11.0 | 0.0 | 1.6 | 1.7  | 10.2 |       | 3.1  | 0.21 | 4.04  | 0.3  |
| AB2R7F4  | 2 |      | 0.0 | 2.1 | 2.9  | 16.1 | 0.047 | 5.2  | 0.47 | 3.91  | 0.5  |
| AB2R8F1  | 2 | 10.4 | 0.0 | 1.5 | 28.4 | 10.3 |       | 2.5  | 0.27 | 2.24  | 0.6  |
| AB2R8F2  | 2 | 9.7  | 0.0 | 1.4 | 37.5 | 16.5 |       | 2.6  | 0.33 | 2.23  | 0.8  |
| AB2R8F3  | 2 | 11.9 | 0.0 | 1.3 |      | 21.6 |       | 2.8  | 0.28 | 3.28  | 0.9  |
| AB2R9F0  | 2 | 11.7 | 0.0 | 2.6 |      | 11.6 |       | 2.3  | 0.18 |       | 0.4  |
| AB2R9F1  | 2 | 9.8  | 0.0 | 2.3 | 34.6 | 6.4  |       | 2.2  | 0.19 |       | 0.3  |
| AB2R9F2  | 2 | 10.2 |     | 2.9 | 36.7 | 9.6  |       | 2.4  | 0.28 |       | 0.8  |
| AB2R9F3  | 2 |      |     | 2.4 |      | 14.7 |       |      | 0.31 |       | 0.9  |
| AB3R1F0  | 3 | 13.7 | 1.0 | 3.2 | 3.3  | 25.1 | 0.471 | 7.7  | 0.14 | 2.13  | 13.3 |
| AB3R1F0  | 3 | 12.1 | 0.1 | 3.4 | 5.8  | 68.2 | 0.380 | 6.5  | 0.25 | 11.25 | 39.1 |
| AB3R1F1  | 3 | 14.6 | 0.1 | 3.7 | 4.5  | 25.3 | 0.554 | 7.0  | 0.13 | 1.94  | 13.1 |
| AB3R1F1  | 3 | 12.7 | 0.1 | 2.1 | 6.0  | 81.8 | 0.684 | 6.5  | 0.10 | 14.10 | 28.0 |
| AB3R1F2  | 3 | 12.5 | 0.1 | 5.0 | 8.1  | 41.8 | 1.763 | 7.0  | 0.13 | 2.81  | 15.2 |
| AB3R1F2  | 3 | 9.9  | 0.1 | 0.9 | 5.8  | 41.3 | 0.478 | 4.0  | 0.30 | 9.16  | 11.4 |
| AB3R1F3  | 3 | 11.7 | 0.4 | 5.5 | 7.9  | 37.2 | 1.457 | 6.0  | 0.25 | 1.73  | 14.3 |
| AB3R1F3  | 3 | 8.4  | 0.0 | 1.6 | 1.9  | 17.5 | 0.131 | 3.3  | 0.09 | 9.04  | 3.5  |
| AB3R1F4  | 3 | 17.2 | 0.5 | 3.7 | 6.0  | 44.1 | 1.281 | 9.6  | 0.11 | 2.08  | 19.8 |
| AB3R1F5  | 3 |      | 1.3 |     | 18.3 | 86.2 | 2.872 |      | 0.69 | 2.40  | 21.8 |
| AB3R2F0  | 3 | 12.1 | 0.2 | 4.9 | 3.2  | 15.7 | 1.554 | 6.3  | 0.01 | 2.29  | 8.9  |
| AB3R2F0  | 3 | 12.0 | 0.1 | 2.0 | 3.3  | 57.4 | 0.741 | 6.6  | 0.06 | 0.77  | 86.4 |
| AB3R2F1  | 3 | 10.4 | 0.2 | 2.7 | 5.5  | 23.4 | 5.139 | 5.5  | 0.13 | 5.42  | 9.3  |
| AB3R2F1  | 3 | 10.2 | 0.0 | 2.6 | 4.4  | 38.2 | 1.313 | 4.8  | 0.15 | 3.32  | 13.7 |
| AB3R2F2  | 3 | 12.8 | 0.2 | 3.3 | 4.7  | 26.2 |       | 8.7  | 0.16 | 5.01  | 14.4 |
| AB3R2F2  | 3 | 10.8 | 0.0 | 2.2 | 3.2  | 36.2 | 0.795 | 4.1  | 0.08 | 5.66  | 11.2 |
| AB3R2F3  | 3 | 12.9 | 0.3 | 4.6 | 6.3  | 46.0 |       | 7.5  | 0.30 | 5.79  | 22.4 |
| AB3R2F4  | 3 | 15.1 | 0.2 | 4.8 | 13.2 | 70.8 |       | 10.7 | 0.84 | 9.39  | 24.9 |
| AB3R3F1  | 3 | 8.1  | 0.7 | 1.4 | 5.1  | 14.3 | 0.458 | 4.7  | 0.05 | 4.25  | 9.0  |
| AB3R3F10 | 3 | 10.4 | 0.0 | 3.8 | 3.2  | 40.5 | 0.485 | 4.0  | 0.10 | 2.80  | 10.9 |
| AB3R3F2  | 3 | 11.3 | 0.8 | 2.5 | 5.2  | 23.3 | 0.593 | 6.4  | 0.05 | 1.43  | 10.9 |
| AB3R3F3  | 3 | 9.8  | 1.3 | 2.7 | 7.6  | 36.8 | 1.635 | 6.1  | 0.08 | 0.67  | 13.8 |
| AB3R3F4  | 3 | 12.8 |     | 3.1 | 5.7  | 38.9 | 2.039 | 7.1  | 0.18 | 0.72  | 13.0 |
| AB3R3F4  | 3 | 12.7 | 0.0 | 3.0 | 5.3  | 60.8 | 1.494 | 6.0  | 0.20 | 5.22  | 14.6 |
| AB3R3F5  | 3 | 12.9 |     | 3.8 | 7.3  | 52.1 | 2.181 | 6.5  | 0.26 | 1.86  | 16.4 |
| AB3R3F5  | 3 | 15.8 | 0.0 | 4.8 | 5.5  | 65.3 | 1.209 | 6.0  | 0.65 | 6.14  | 26.9 |
| AB3R3F6  | 3 | 15.1 | 0.1 |     | 9.7  | 83.2 | 1.562 | 7.5  | 0.40 | 4.36  | 26.3 |
| AB3R3F7  | 3 | 13.6 | 0.1 | 3.5 | 3.1  | 32.6 | 0.311 | 7.0  | 0.03 | 2.78  | 17.2 |
| AB3R3F8  | 3 | 12.9 | 0.0 | 4.8 | 3.8  | 34.9 | 0.368 | 5.3  | 0.13 | 2.02  | 11.5 |
| AB3R3F9  | 3 | 11.6 | 0.0 | 3.7 | 3.3  | 35.9 | 0.534 | 4.4  | 0.42 | 2.30  | 9.7  |
| AB3R4F1  | 3 | 12.9 | 0.1 | 1.4 | 4.5  | 87.1 | 0.410 | 7.2  | 0.36 | 4.94  | 91.6 |
| AB3R4F2  | 3 | 18.1 | 0.2 | 2.6 | 10.5 |      | 1.450 |      | 0.66 | 4.52  |      |
| AB3R4F3  | 3 | 14.4 | 0.1 | 1.8 | 7.1  | 67.1 | 2.318 | 7.7  | 0.69 |       | 27.2 |

|         |   |      |     |     |      |       |       |      |      |       |       |
|---------|---|------|-----|-----|------|-------|-------|------|------|-------|-------|
| AB3R4F4 | 3 |      | 0.1 | 5.2 | 29.0 |       | 6.641 | 11.8 |      |       | 48.2  |
| AB3R4F5 | 3 | 16.2 | 0.0 | 2.5 | 4.3  | 76.5  | 1.039 | 7.8  | 0.18 | 9.15  | 32.4  |
| AB3R4F6 | 3 | 9.8  | 0.0 | 1.9 | 2.8  | 35.1  | 0.653 | 3.9  | 0.13 | 16.15 | 11.3  |
| AB3R4F7 | 3 | 9.0  | 0.0 | 2.6 | 2.1  | 36.8  | 0.435 | 3.6  | 0.12 | 30.82 | 17.1  |
| AB3R5F1 | 3 | 8.7  | 0.0 | 1.0 | 3.9  | 12.4  | 0.620 | 3.0  | 0.06 | 3.22  | 4.0   |
| AB3R5F2 | 3 | 9.1  | 0.1 | 2.0 | 2.9  | 15.0  | 0.560 | 3.7  | 0.06 | 5.97  | 5.4   |
| AB3R6F0 | 3 | 12.5 | 0.1 | 1.5 | 2.0  | 39.1  | 0.315 | 5.4  | 0.38 | 4.21  | 62.8  |
| AB3R6F1 | 3 | 17.7 | 0.1 | 2.6 | 4.9  | 86.8  | 1.145 | 10.2 |      | 1.85  | 96.8  |
| AB3R6F2 | 3 | 11.6 | 0.1 | 1.3 | 4.0  | 83.2  | 0.479 | 8.3  | 0.18 | 7.95  | 57.3  |
| AB3R6F3 | 3 | 14.5 | 0.1 | 2.5 | 6.8  | 96.1  | 0.823 | 11.3 | 0.25 | 4.05  | 45.7  |
| AB3R6F4 | 3 | 12.5 | 0.1 | 3.5 | 6.0  | 122.0 | 0.890 | 8.3  | 0.55 | 14.42 | 58.1  |
| AB3R6F5 | 3 | 18.7 | 0.1 | 4.6 | 10.9 | 140.1 | 2.174 |      | 0.36 | 16.37 | 32.4  |
| AB3R6F6 | 3 | 15.3 | 0.0 | 4.7 | 5.7  | 91.3  | 1.271 | 8.1  | 0.25 | 10.72 | 38.0  |
| AB3R7F0 | 3 | 11.1 | 0.0 | 1.7 | 7.7  | 36.3  | 0.128 | 5.4  | 0.10 | 21.60 | 34.3  |
| AB3R7F1 | 3 | 14.6 | 0.0 | 3.1 | 8.7  | 43.3  |       | 7.5  | 0.12 | 22.85 | 21.6  |
| AB3R7F2 | 3 | 15.3 | 0.0 | 3.1 | 10.0 | 63.6  |       | 9.1  | 0.19 | 20.00 | 30.9  |
| AB3R7F3 | 3 | 13.8 | 0.0 | 3.2 | 14.1 | 36.0  |       | 7.0  | 0.07 | 8.24  | 18.8  |
| AB3R8F1 | 3 | 8.7  | 0.1 | 1.7 | 16.5 | 74.7  | 0.075 | 4.9  | 0.12 | 22.28 | 64.8  |
| AB3R8F2 | 3 | 10.5 | 0.1 | 2.2 | 15.7 | 52.6  | 0.088 | 3.8  | 0.69 | 18.61 | 37.3  |
| AB3R8F3 | 3 | 10.1 | 0.1 | 2.8 | 11.0 | 48.8  | 0.068 | 4.0  | 0.10 | 15.96 | 30.2  |
| AB3R9F0 | 3 | 8.1  | 0.1 | 2.4 | 24.1 | 49.8  | 0.111 | 5.7  | 0.09 |       |       |
| AB3R9F1 | 3 | 13.1 | 0.1 | 2.0 | 33.5 | 89.2  | 0.065 | 8.7  | 0.10 | 16.47 | 112.2 |
| AB3R9F2 | 3 | 10.3 | 0.1 | 2.3 | 53.6 | 91.9  | 1.202 | 8.8  | 0.30 |       | 78.9  |
| AB3R9F3 | 3 | 18.2 | 0.1 |     |      |       |       | 9.2  |      |       | 67.2  |

#### Control System

|          |   |      |     |     |      |      |       |     |      |      |     |
|----------|---|------|-----|-----|------|------|-------|-----|------|------|-----|
| AB0L2F0  | 0 | 9.7  | 0.1 | 1.0 | 13.1 | 17.3 | 0.076 | 2.3 |      | 1.01 | 0.7 |
| AB0L2F1  | 0 | 11.4 | 0.0 | 1.0 | 11.1 | 33.9 | 0.228 | 2.3 |      | 0.98 | 0.9 |
| AB0L2F2  | 0 | 13.6 | 0.0 | 2.2 |      | 29.8 |       | 3.8 |      | 1.41 | 1.0 |
| AB0L3F1  | 0 | 15.6 | 0.1 | 0.4 | 3.9  | 34.5 | 0.056 | 4.4 |      | 2.75 | 0.9 |
| AB0L3F2  | 0 |      | 0.1 | 2.0 | 8.8  | 21.7 | 0.067 | 6.2 | 0.27 |      | 0.8 |
| AB0L4F2  | 0 | 11.5 | 0.0 | 0.8 | 5.6  | 14.4 | 0.033 | 4.8 |      | 0.27 | 0.5 |
| Ab0L5F1  | 0 | 10.3 | 0.0 | 2.4 | 6.5  | 6.5  |       | 5.8 |      |      | 0.2 |
| AB0L5F2  | 0 | 10.8 | 0.0 | 1.6 | 5.6  | 7.4  |       | 6.8 |      |      | 0.2 |
| AB0L6F3  | 0 | 9.8  | 0.0 | 1.1 | 3.5  | 49.5 | 0.078 | 5.8 |      |      | 1.0 |
| AB1L1F3  | 1 | 10.4 |     | 1.2 | 3.0  |      | 0.085 | 2.5 | 1.47 | 2.31 | 0.6 |
| AB1L1F5  | 1 | 10.0 | 0.1 | 0.9 | 2.9  | 30.1 | 0.057 | 3.2 |      | 0.10 | 0.3 |
| AB1L2F1  | 1 | 7.6  | 0.1 | 1.0 | 5.8  | 17.6 | 0.059 | 1.6 |      | 0.50 |     |
| AB1L2F2  | 1 | 7.9  | 0.0 | 0.7 | 2.8  | 15.0 | 0.040 | 1.7 | 0.68 | 1.25 | 0.4 |
| AB1L3F1  | 1 | 9.8  | 0.0 | 1.3 | 3.3  | 19.4 | 0.123 | 1.7 | 1.53 | 0.93 | 0.4 |
| AB1L3F2  | 1 | 8.7  | 0.0 | 1.1 | 2.5  | 18.4 | 0.085 | 1.7 | 0.60 | 1.25 | 0.4 |
| AB1L3F3  | 1 | 6.9  | 0.0 | 1.4 | 2.5  | 19.4 | 0.046 | 1.7 | 0.40 | 1.72 | 0.5 |
| Ab1L4F1  | 1 | 10.1 | 0.0 | 1.5 | 4.6  | 11.4 | 0.126 | 1.7 | 0.67 | 0.59 | 0.2 |
| AB1L4F2  | 1 | 10.7 | 0.0 | 2.3 | 4.0  | 14.9 | 0.026 | 1.7 | 0.57 | 0.39 | 0.3 |
| AB1L5F0  | 1 | 13.8 | 0.1 | 2.0 | 7.4  | 12.7 |       | 4.2 | 0.11 |      | 0.3 |
| AB1L5F1  | 1 | 14.7 | 0.0 | 5.5 | 8.4  | 13.2 |       | 3.0 | 0.97 | 1.01 | 0.2 |
| AB1L5F2  | 1 | 11.5 | 0.0 | 5.1 | 9.3  | 15.0 |       | 2.1 | 0.98 | 0.46 | 0.2 |
| AB1L5F3  | 1 | 13.6 | 0.0 | 4.7 | 8.2  | 15.4 |       | 2.7 | 0.32 | 1.68 | 0.2 |
| AB1L5F4  | 1 | 11.3 | 0.0 | 4.6 | 8.6  | 24.4 |       | 2.0 | 0.61 | 0.09 | 0.3 |
| AB1L6F1  | 1 | 12.0 | 0.0 | 3.3 | 7.0  | 12.8 | 0.009 | 3.1 | 0.61 | 0.64 | 0.2 |
| AB1L6F2  | 1 | 13.8 | 0.0 | 2.5 | 5.6  | 12.5 |       | 3.7 | 0.52 |      | 0.1 |
| AB1L6F3  | 1 |      | 0.0 | 3.0 | 8.6  | 17.9 |       |     | 0.33 | 3.84 | 0.2 |
| AB1L6F42 | 1 | 15.4 | 0.0 | 3.2 | 7.1  | 22.7 |       | 5.4 | 0.35 | 1.91 | 0.2 |
| AB1L6F5  | 1 | 9.2  | 0.0 | 2.7 | 7.7  | 28.7 |       | 1.7 | 0.50 | 0.59 | 0.2 |
| AB1L6F6  | 1 | 11.2 | 0.0 | 3.6 | 9.2  |      |       | 2.7 | 0.47 | 1.80 | 0.3 |
| AB2L1F0  | 2 | 8.6  |     | 0.6 | 0.8  | 9.7  |       | 2.5 |      |      | 0.2 |
| AB2L1F1  | 2 | 8.7  | 0.0 | 0.6 | 1.5  | 6.3  | 0.043 | 2.2 | 0.04 |      | 0.2 |

|                                  |   |      |     |     |      |      |       |     |      |      |     |
|----------------------------------|---|------|-----|-----|------|------|-------|-----|------|------|-----|
| AB2L1F2                          | 2 | 8.7  | 0.0 | 0.5 | 3.9  | 13.1 | 0.049 | 2.5 | 0.04 | 0.78 | 0.3 |
| AB2L1F4                          | 2 |      | 0.1 | 0.9 | 3.1  |      |       | 3.2 |      | 3.75 | 0.5 |
| AB2L2F0                          | 2 | 10.7 | 0.0 | 0.7 | 1.2  | 3.7  |       | 2.6 |      | 1.06 |     |
| AB2L2F1                          | 2 | 9.7  | 0.0 | 0.5 | 7.6  | 10.9 |       | 2.5 | 0.03 |      | 0.4 |
| AB2L2F2                          | 2 | 9.8  | 0.0 | 0.8 | 3.4  | 9.6  | 0.040 | 2.9 | 0.02 |      | 0.4 |
| AB2L2F3                          | 2 | 9.6  | 0.0 | 0.6 | 2.2  | 12.7 |       | 3.1 | 0.03 |      | 0.5 |
| AB2L3F1                          | 2 | 9.3  | 0.0 | 1.5 |      | 14.8 |       | 2.5 | 0.02 |      | 0.4 |
| AB2L3F2                          | 2 | 11.0 | 0.0 | 1.6 | 14.0 | 27.0 |       | 2.9 | 0.11 | 1.48 | 0.5 |
| AB2L3F3                          | 2 | 11.1 | 0.0 |     | 16.6 | 23.2 |       | 3.0 | 0.04 | 2.07 | 0.4 |
| AB2L4F0                          | 2 | 8.2  | 0.0 | 1.2 | 1.2  | 3.5  |       | 2.4 | 0.06 |      |     |
| AB2L4F1                          | 2 | 8.0  | 0.0 | 0.4 | 1.1  | 9.0  |       | 2.2 | 0.05 |      | 0.2 |
| AB2L4F2                          | 2 | 7.4  | 0.0 | 0.6 | 5.7  | 14.8 | 0.044 | 2.6 | 0.07 |      | 0.4 |
| AB2L4F3                          | 2 | 8.7  | 0.0 | 0.4 | 7.1  | 16.2 | 0.053 | 3.3 | 0.04 |      | 0.4 |
| AB2L5F0                          | 2 | 7.9  | 0.1 | 1.9 | 7.2  | 12.9 |       | 2.4 | 0.28 |      | 0.5 |
| AB2L5F1                          | 2 | 7.7  | 0.1 | 0.9 | 7.3  | 20.1 | 0.054 | 2.2 | 0.20 |      | 0.6 |
| AB2L5F2                          | 2 | 7.2  | 0.0 | 1.1 | 2.9  | 9.0  |       | 2.3 | 0.19 |      | 0.3 |
| AB2L5F3                          | 2 | 8.8  | 0.0 | 1.5 | 2.6  | 15.5 | 0.082 | 3.2 | 0.16 |      | 0.4 |
| AB3L1F3                          | 3 | 9.8  | 0.1 | 2.1 | 4.0  | 28.0 | 0.080 | 2.4 | 0.36 | 5.99 | 0.7 |
| AB3L1F4                          | 3 | 9.0  | 0.1 | 2.8 | 4.6  | 30.8 | 0.082 | 2.8 | 0.15 | 4.10 | 0.7 |
| AB3L1F5                          | 3 |      | 0.1 |     |      |      |       |     |      | 3.88 |     |
| AB3L1F6                          | 3 | 9.1  | 0.0 | 3.6 | 3.5  | 33.1 | 0.019 | 2.7 | 0.16 |      | 0.5 |
| AB3L2F0                          | 3 | 8.0  | 0.0 | 1.4 | 1.8  | 4.5  | 0.017 | 1.7 | 0.09 |      | 0.1 |
| AB3L2F1                          | 3 | 7.7  | 0.0 | 0.6 | 5.5  | 14.1 | 0.119 | 1.7 | 0.07 |      | 0.4 |
| AB3L2F2                          | 3 | 7.5  | 0.0 | 1.7 | 4.5  | 23.2 | 0.131 | 1.6 | 0.07 |      | 0.6 |
| AB3L3F0                          | 3 | 11.5 | 0.0 | 1.8 | 3.6  | 5.0  |       | 1.7 | 0.11 |      | 0.1 |
| AB3L3F1                          | 3 | 11.1 | 0.0 | 2.5 | 1.7  | 3.2  |       | 1.6 | 0.07 |      | 0.1 |
| AB3L3F2                          | 3 | 11.0 | 0.0 | 1.9 | 2.3  | 6.6  | 0.039 | 1.6 | 0.06 | 0.63 | 0.2 |
| AB3L3F3                          | 3 | 10.6 | 0.0 | 1.5 | 2.1  | 12.1 | 0.057 | 1.8 | 0.08 | 0.32 | 0.4 |
| AB3L3F4                          | 3 | 11.0 | 0.0 | 2.0 | 2.5  | 14.9 | 0.058 | 1.9 | 0.08 | 2.45 | 0.5 |
| AB3L3F5                          | 3 | 11.1 | 0.0 | 1.9 | 3.2  | 15.1 | 0.054 | 2.8 | 0.09 | 5.20 | 0.2 |
| AB3L4F1                          | 3 | 7.6  | 0.0 | 1.7 | 17.0 | 9.2  |       | 1.6 | 0.12 | 5.08 | 0.4 |
| AB3L4F2                          | 3 | 7.7  | 0.0 | 1.3 | 14.3 | 6.0  |       | 1.6 | 0.06 | 4.70 | 0.2 |
| AB3L4F3                          | 3 | 8.9  | 0.0 | 2.1 | 22.6 | 9.6  |       | 2.1 | 0.11 | 5.90 | 0.2 |
| AB3L5F1                          | 3 | 7.2  | 0.1 | 2.7 | 6.3  | 22.3 | 0.023 | 1.7 | 0.13 | 6.14 | 0.5 |
| AB3L5F2                          | 3 | 7.5  | 0.1 | 2.1 | 8.2  | 24.1 | 0.042 | 1.7 | 0.07 | 6.30 | 0.5 |
| AB3L5F3                          | 3 | 8.0  | 0.0 | 1.2 | 9.3  | 7.1  |       | 1.9 | 0.09 | 7.17 | 0.2 |
| <b>Number of rejected points</b> |   | 9    | 8   | 8   | 11   | 9    | 76    | 11  | 23   | 80   | 11  |
