# Supplementary material for: Heavy metal uptake of nearshore benthic foraminifera during multi-metal culturing experiments
Source: Copernicus journal article supplement (doi:10.5194/bg-19-629-2022), 2022-02-03
Supplement: Supplementary file 1 [file bg-19-629-2022-supplement.zip › TableS3.pdf]

| <i>E. excavatum</i> | Phase | Cr/Ca                    | Mn/Ca                  | Ni/Ca                    | Cu/Ca                    | Zn/Ca                    | Ag/Ca                    | Cd/Ca                    | Sn/Ca                    | Hg/Ca                  | Pb/Ca                    |
|---------------------|-------|--------------------------|------------------------|--------------------------|--------------------------|--------------------------|--------------------------|--------------------------|--------------------------|------------------------|--------------------------|
| Metal System        |       | $\mu\text{mol mol}^{-1}$ | $\text{mmol mol}^{-1}$ | $\mu\text{mol mol}^{-1}$ | $\text{nmol mol}^{-1}$ | $\mu\text{mol mol}^{-1}$ |
| E0R5F2              | 0     | 17.3                     | 0.3                    | 4.3                      | 12.2                     | 26.7                     | 0.4                      | 5.6                      | 0.2                      | 6.79                   | 1.6                      |
| E1R1-0              | 1     | 69.8                     | 1.4                    |                          | 24.7                     | 26.0                     |                          |                          | 7.1                      | 131.13                 | 3.5                      |
| E1R1-1              | 1     | 7.2                      |                        |                          | 18.7                     |                          | 0.1                      |                          | 5.4                      | 123.50                 |                          |
| E1R2-0              | 1     | 29.8                     | 0.2                    | 6.4                      | 6.5                      | 20.0                     | 0.0                      | 3.6                      | 0.7                      | 38.71                  | 0.5                      |
| E1R2-1              | 1     | 44.4                     | 0.4                    | 12.5                     | 7.8                      | 24.3                     | 0.0                      | 6.9                      | 2.5                      | 66.60                  | 2.7                      |
| E1R3-0              | 1     | 90.7                     | 0.3                    | 8.9                      | 3.4                      | 21.2                     | 0.1                      |                          | 0.3                      | 132.46                 | 0.5                      |
| E1R3-01             | 1     | 18.7                     | 0.2                    | 6.1                      | 4.3                      | 20.2                     |                          | 2.2                      | 0.7                      | 9.77                   | 0.4                      |
| E1R3-1              | 1     | 47.0                     | 0.3                    | 2.8                      | 2.5                      | 14.2                     | 0.0                      | 6.5                      | 0.6                      | 83.77                  | 0.7                      |
| E1R3-11             | 1     | 53.6                     | 0.4                    | 5.1                      | 2.3                      | 23.6                     | 0.0                      | 7.1                      | 0.2                      | 76.82                  | 0.6                      |
| E1R3-2              | 1     | 18.9                     | 0.2                    | 2.7                      | 1.5                      | 12.0                     | 0.1                      | 2.2                      | 0.2                      | 6.63                   | 0.7                      |
| E1R4-0              | 1     | 26.5                     | 0.3                    | 26.0                     | 19.0                     | 28.9                     | 0.1                      | 2.8                      | 5.9                      | 32.90                  | 1.7                      |
| E1R4-1              | 1     | 23.5                     | 0.7                    | 14.0                     | 10.5                     | 22.9                     | 0.0                      | 2.4                      | 3.4                      | 30.52                  | 1.9                      |
| E1R5-0              | 1     | 31.3                     | 0.1                    | 18.8                     | 11.4                     | 23.0                     | 0.0                      | 3.6                      | 7.0                      | 40.78                  | 3.3                      |
| E1R5-1              | 1     | 28.0                     | 0.1                    | 15.5                     | 9.2                      | 15.6                     |                          | 3.3                      | 3.8                      | 44.15                  | 2.0                      |
| E1R6-1              | 1     | 22.3                     | 0.6                    | 12.1                     | 9.1                      | 26.7                     |                          | 2.7                      | 3.6                      | 49.02                  | 0.9                      |
| E1R7-0              | 1     | 18.4                     | 0.0                    | 3.0                      | 2.3                      | 14.6                     |                          | 2.0                      | 1.5                      | 16.93                  | 0.6                      |
| E1R7-1              | 1     | 22.5                     | 2.0                    | 2.6                      | 3.3                      | 25.3                     | 0.1                      | 1.8                      | 2.9                      | 19.31                  | 2.2                      |
| E1R7-2              | 1     | 28.3                     | 3.0                    | 4.6                      | 6.0                      |                          |                          | 2.9                      | 6.5                      | 42.92                  | 3.3                      |
| E1R8-0              | 1     | 18.0                     | 1.9                    | 4.2                      | 3.0                      | 13.8                     | 0.0                      | 2.0                      | 0.8                      | 7.69                   | 0.5                      |
| E1R8-1              | 1     | 16.6                     | 2.1                    | 5.2                      | 4.7                      | 13.9                     | 0.0                      | 1.6                      | 1.7                      | 9.36                   | 1.3                      |
| E1R8-2              | 1     | 36.2                     | 1.2                    | 4.8                      | 4.1                      | 13.0                     |                          | 4.5                      | 1.2                      | 35.66                  | 0.7                      |
| E1RN1-0             | 1     |                          | 1.1                    | 23.1                     | 39.2                     | 21.4                     |                          | 3.8                      | 2.3                      |                        | 1.2                      |
| E1RN10-0            | 1     | 76.2                     | 0.1                    | 15.0                     | 33.3                     | 15.8                     | 0.0                      | 7.7                      | 2.7                      | 81.07                  | 1.3                      |
| E1RN11-0            | 1     | 25.5                     | 0.4                    | 8.3                      | 27.1                     | 23.9                     |                          | 1.4                      | 2.1                      | 16.73                  | 1.4                      |
| E1RN12-0            | 1     | 12.9                     | 0.1                    | 2.8                      | 10.8                     | 11.1                     |                          | 0.7                      | 0.9                      | 7.77                   | 0.3                      |
| E1RN13-B            | 1     | 13.1                     | 1.0                    | 3.3                      | 11.4                     | 10.8                     | 0.0                      | 0.7                      | 2.2                      | 5.21                   | 1.0                      |
| E1RN2-0             | 1     | 34.5                     | 1.2                    | 2.8                      | 23.6                     | 18.9                     | 0.0                      | 2.5                      | 4.5                      |                        | 2.3                      |
| E1RN2-0             | 1     | 13.1                     | 0.0                    | 3.1                      | 4.8                      | 9.6                      | 0.0                      | 0.3                      | 0.6                      | 474.19                 | 0.4                      |
| E1RN3-0             | 1     | 30.9                     | 0.3                    | 5.6                      | 37.1                     | 12.8                     | 0.0                      | 2.0                      | 2.7                      | 54.72                  | 1.5                      |
| E1RN3-0             | 1     | 17.8                     | 0.1                    | 2.6                      | 7.7                      | 11.5                     |                          | 0.5                      | 0.8                      | 21.43                  | 0.5                      |
| E1RN4-0             | 1     |                          | 1.6                    | 9.1                      | 19.7                     | 25.2                     |                          | 3.2                      | 3.8                      | 35.98                  | 1.9                      |
| E1RN5-0             | 1     | 42.3                     | 0.4                    | 7.2                      | 19.6                     | 15.3                     | 0.0                      | 3.9                      | 2.6                      | 300.41                 | 1.5                      |
| E1RN5-0             | 1     | 17.6                     | 1.1                    | 1.7                      | 4.2                      | 14.9                     | 0.0                      | 0.4                      | 0.7                      | 270.91                 | 0.7                      |
| E1RN6-0             | 1     | 29.4                     | 0.1                    | 5.9                      | 26.9                     | 15.0                     |                          | 1.7                      | 4.2                      | 438.99                 | 2.1                      |
| E1RN6-0             | 1     |                          | 0.7                    | 3.5                      | 9.6                      | 25.1                     |                          | 3.2                      | 4.2                      | 26.18                  | 1.2                      |
| E1RN8-0             | 1     | 64.5                     | 1.0                    | 20.1                     |                          | 21.0                     | 0.0                      | 4.0                      | 2.3                      | 142.17                 | 1.4                      |
| E1RN9-0             | 1     | 56.6                     | 0.1                    | 9.6                      | 19.7                     | 18.8                     | 0.1                      | 3.2                      | 2.1                      | 40.81                  | 0.9                      |
| E2R2-0              | 2     | 44.8                     | 0.4                    | 6.4                      | 6.3                      | 25.3                     | 0.3                      | 5.5                      |                          | 2.24                   | 10.1                     |
| E2R3-0              | 2     | 39.2                     | 0.2                    | 8.1                      | 6.1                      | 26.2                     | 0.8                      | 4.8                      | 5.4                      | 31.13                  | 5.5                      |
| E2R3-1              | 2     | 36.8                     | 0.7                    | 6.8                      | 6.5                      | 35.2                     | 0.6                      | 3.6                      | 4.2                      | 12.96                  | 7.9                      |
| E2R4-1              | 2     | 48.6                     | 1.2                    | 14.3                     | 9.5                      | 35.0                     | 0.0                      | 5.4                      |                          | 57.60                  | 15.5                     |
| E2R5-0              | 2     | 53.7                     | 0.6                    | 23.3                     | 20.7                     |                          | 1.0                      | 8.0                      |                          | 65.98                  |                          |
| E2R6-0              | 2     | 43.8                     | 1.2                    |                          | 20.5                     | 67.6                     | 0.6                      | 5.9                      | 2.9                      | 38.39                  | 3.3                      |
| E2R7-0              | 2     | 13.8                     | 1.3                    | 1.9                      | 2.1                      | 11.4                     | 0.1                      | 1.4                      | 0.6                      | 7.85                   | 1.0                      |
| E2R7-1              | 2     | 25.0                     | 1.2                    | 14.8                     | 11.5                     | 32.5                     | 1.3                      | 2.4                      | 6.8                      | 19.14                  | 7.5                      |
| E2R8-0              | 2     | 18.5                     | 0.0                    | 2.4                      | 1.8                      | 9.6                      | 0.0                      | 1.5                      | 0.6                      | 6.77                   | 0.5                      |
| E2R8-1              | 2     | 29.6                     | 0.1                    | 7.4                      | 2.6                      | 15.9                     | 0.1                      | 3.2                      | 1.3                      | 19.51                  | 2.1                      |
| E2R9-0              | 2     | 18.0                     | 0.0                    | 5.0                      | 5.8                      | 26.3                     | 0.2                      | 1.6                      | 0.9                      | 6.21                   | 0.7                      |
| E2R9-1              | 2     | 66.5                     | 0.5                    | 9.7                      | 5.1                      | 26.8                     | 0.3                      | 8.5                      | 1.6                      | 29.96                  | 4.1                      |
| E2RN1-0             | 2     | 64.0                     | 0.7                    | 13.9                     | 26.9                     | 37.3                     |                          | 5.2                      | 3.1                      | 242.63                 | 2.6                      |
| E2RN10-0            | 2     | 50.9                     | 2.0                    | 11.0                     | 18.7                     | 33.8                     | 0.7                      | 3.2                      | 4.3                      | 21.84                  | 5.1                      |
| E2RN11-0            | 2     | 27.3                     | 2.2                    | 6.2                      | 20.0                     | 39.3                     | 0.3                      | 1.9                      | 5.2                      | 98.30                  | 4.0                      |

|                       |   |       |     |      |       |      |      |      |     |        |       |
|-----------------------|---|-------|-----|------|-------|------|------|------|-----|--------|-------|
| E2RN12-0              | 2 | 127.8 | 0.3 | 9.1  | 21.6  | 40.3 | 0.3  | 10.3 | 6.7 | 33.04  | 4.8   |
| E2RN12-1              | 2 | 54.1  | 0.1 | 6.4  | 11.4  | 25.4 | 0.2  | 3.7  | 3.2 | 5.88   | 4.3   |
| E2RN13-0              | 2 | 18.1  | 1.5 | 2.2  | 4.6   | 10.5 | 0.1  | 0.9  | 0.9 | 47.56  | 0.8   |
| E2RN2-0               | 2 | 71.4  | 0.4 | 11.4 | 19.7  | 42.2 | 3.4  | 6.5  | 5.5 | 625.94 | 5.3   |
| E2RN3-0               | 2 |       | 2.4 |      |       | 68.0 | 2.5  |      |     | 828.07 | 15.0  |
| E2RN5-0               | 2 | 46.1  |     | 12.0 | 15.8  | 25.5 | 1.5  | 3.1  | 1.5 |        | 2.5   |
| E2RN6-0               | 2 | 17.4  | 0.2 | 9.2  | 14.6  | 16.6 | 1.6  | 0.7  | 1.6 | 471.33 | 1.5   |
| E2RN7-0               | 2 | 29.0  | 0.0 | 5.3  | 7.9   | 19.1 | 0.1  | 1.5  | 0.8 | 87.26  | 1.0   |
| E2RN8-0               | 2 | 18.0  | 0.4 | 3.0  | 4.7   | 15.4 | 0.1  | 1.0  | 0.5 | 9.14   | 1.0   |
| E3R1-0                | 3 | 19.8  |     | 7.0  | 9.9   | 68.1 | 0.7  | 3.9  | 7.1 | 33.84  | 21.9  |
| E3R2-0                | 3 | 26.8  | 0.1 | 27.5 | 13.0  | 46.8 | 0.3  | 2.5  | 5.1 | 27.55  | 26.2  |
| E3R2-1                | 3 | 33.5  | 2.4 | 12.4 | 11.0  | 58.3 | 1.4  | 4.2  | 3.5 | 80.27  | 70.0  |
| E3R3-0                | 3 | 11.5  | 2.2 | 17.9 | 18.7  | 43.4 | 3.1  | 1.4  | 1.2 | 4.96   | 91.1  |
| E3R3-1                | 3 | 24.8  | 2.9 | 23.8 | 11.2  | 49.7 | 8.1  | 2.4  | 1.5 | 20.45  | 68.8  |
| E3R3-2                | 3 | 30.7  | 0.6 | 22.6 | 11.3  | 38.8 | 12.1 | 3.6  | 2.0 | 44.04  | 70.6  |
| E3R4-0                | 3 | 27.3  | 0.7 | 21.4 | 14.1  | 41.2 | 3.3  | 4.5  | 1.2 |        | 117.5 |
| E3R4-1                | 3 | 19.2  | 1.9 | 10.7 | 5.6   | 15.6 | 1.4  | 1.6  | 0.5 | 4.04   | 23.3  |
| E3R5-0                | 3 | 51.3  | 0.8 | 20.1 | 16.8  | 69.5 | 9.9  | 8.1  | 2.2 |        | 102.3 |
| E3R5-1                | 3 | 25.0  | 0.3 | 7.3  | 11.4  | 58.9 | 5.4  | 4.2  | 1.6 |        | 84.9  |
| E3R6-0                | 3 | 13.8  | 0.1 | 4.0  | 2.9   | 13.4 | 0.1  | 1.4  | 0.5 | 6.61   | 13.2  |
| E3R6-1                | 3 | 25.6  | 0.7 | 11.7 | 7.0   | 39.0 | 0.7  | 2.8  | 2.1 |        | 71.7  |
| E3R7-0                | 3 | 38.1  | 0.0 | 9.7  | 5.6   | 36.9 | 0.8  | 5.3  | 0.8 |        | 35.9  |
| E3R7-1                | 3 | 20.8  | 0.7 | 6.7  | 7.0   | 49.0 | 3.4  | 2.8  | 0.8 |        | 68.7  |
| E3R8-0                | 3 | 29.3  | 1.0 | 5.5  | 3.2   | 26.5 | 0.9  | 2.6  | 1.2 | 37.22  | 22.9  |
| E3R9-0                | 3 | 82.5  | 0.2 | 7.4  | 35.0  | 35.7 | 0.0  | 5.5  |     | 146.20 | 39.2  |
| E3RN1-0               | 3 |       | 0.0 | 18.5 | 24.5  | 86.0 | 4.3  | 10.1 | 7.7 | 165.60 | 22.9  |
| E3RN10-0              | 3 | 81.3  | 0.2 | 48.6 | 78.5  | 59.8 | 0.2  | 7.3  | 6.6 | 95.42  |       |
| E3RN11-0              | 3 | 45.2  | 0.1 | 12.1 | 32.8  | 34.8 | 5.0  | 3.3  | 1.4 | 92.49  | 39.1  |
| E3RN11-1              | 3 | 52.9  | 1.2 | 8.9  | 18.2  | 25.2 | 1.4  | 3.9  | 0.9 | 312.47 | 20.5  |
| E3RN12-0              | 3 | 160.0 | 0.0 | 24.1 | 36.5  | 35.7 | 1.0  | 8.6  | 4.7 | 105.58 | 27.1  |
| E3RN12-1              | 3 | 63.2  | 0.9 | 12.0 | 19.7  | 27.5 | 0.3  | 3.5  | 2.4 | 139.07 | 35.5  |
| E3RN13-0              | 3 | 68.3  | 1.3 | 9.2  | 26.6  | 29.0 | 0.5  | 3.9  | 1.8 | 61.57  | 15.6  |
| E3RN14-0              | 3 | 28.1  | 0.9 | 9.8  | 17.2  | 22.5 | 0.7  | 2.9  | 1.1 | 44.50  | 27.6  |
| E3RN2-0               | 3 | 168.2 | 0.9 | 49.0 | 63.1  | 82.5 | 2.6  | 10.4 | 7.8 |        | 85.6  |
| E3RN3-0               | 3 |       | 2.7 |      |       |      | 12.1 |      | 3.9 |        | 120.9 |
| E3RN4-0               | 3 | 37.0  | 0.3 | 17.6 | 34.3  | 46.7 | 1.7  | 3.0  | 0.5 |        | 36.9  |
| E3RN6-0               | 3 | 25.0  | 0.0 | 11.1 | 22.4  | 28.2 | 0.7  | 1.7  | 0.8 | 193.70 | 12.7  |
| E3RN7-0               | 3 | 142.3 | 1.7 | 44.8 | 76.6  |      |      | 9.5  | 4.3 | 134.40 | 122.2 |
| E3RN8-0               | 3 | 75.4  |     | 16.1 | 29.7  | 36.5 |      | 9.4  | 1.4 | 173.07 | 54.2  |
| E3RN9-0               | 3 | 141.7 | 0.7 | 12.8 | 13.4  | 44.9 | 0.0  | 7.8  | 5.7 | 163.93 | 26.3  |
| <b>Control System</b> |   |       |     |      |       |      |      |      |     |        |       |
| E0L2F0                | 0 | 47.6  | 1.1 | 36.8 |       |      |      | 11.8 |     | 22.61  | 8.9   |
| E0L2F1                | 0 | 27.7  | 1.7 | 6.9  | 30.9  | 70.7 | 1.3  |      | 3.6 | 29.90  | 2.7   |
| E0L3F1                | 0 | 12.7  | 0.6 | 1.6  | 6.0   | 33.0 | 0.2  | 4.3  | 0.2 | 5.25   | 1.2   |
| E0L4F0                | 0 | 10.6  | 0.0 | 7.9  | 2.4   | 7.8  | 0.0  | 3.8  | 0.0 | 5.82   | 0.7   |
| E0L4F1                | 0 | 13.3  | 0.2 | 1.9  | 7.4   | 32.5 | 0.1  | 5.5  | 0.4 | 6.42   | 2.5   |
| E0LN1-0               | 0 | 29.4  | 0.5 | 7.4  | 13.0  | 23.4 | 0.1  | 1.0  | 0.5 | 61.10  | 1.2   |
| E0LN2-0               | 0 |       |     |      | 116.1 |      | 0.4  | 12.9 | 4.8 | 19.74  |       |
| E0LN3-0               | 0 | 31.1  | 0.0 | 7.7  | 21.6  | 36.1 | 0.2  | 1.5  | 1.7 |        | 0.9   |
| E0LN4-0               | 0 | 36.5  | 0.1 | 19.1 | 27.5  | 30.4 | 0.3  | 1.6  | 0.4 | 11.47  | 1.0   |
| E0LN5-0               | 0 | 15.8  | 0.4 | 4.3  | 7.5   | 14.4 | 0.0  | 0.7  | 0.2 | 15.90  | 0.5   |
| E0LN6-0               | 0 | 13.6  | 0.1 | 5.5  | 9.8   | 14.4 | 0.0  | 0.4  | 0.2 | 6.32   | 0.9   |
| E0LN6-1               | 0 | 18.4  | 0.2 | 13.0 | 21.3  | 27.9 | 0.1  | 1.1  | 0.4 | 4.22   | 1.4   |
| E0LN7-0               | 0 | 22.4  | 0.7 | 6.3  | 15.4  | 28.4 | 0.0  | 1.2  | 0.4 | 4.08   | 0.8   |
| E0LN8-0               | 0 | 18.9  | 0.0 | 3.9  | 11.3  | 17.5 | 0.0  | 0.6  | 0.2 | 1.95   | 1.1   |
| E1L1F0                | 1 | 15.4  | 0.7 | 1.1  | 2.8   | 10.6 |      | 1.8  | 0.7 | 3.28   | 0.3   |

|                                      |   |       |     |      |       |       |     |       |      |        |     |
|--------------------------------------|---|-------|-----|------|-------|-------|-----|-------|------|--------|-----|
| E1L2-0                               | 1 | 381.6 | 0.8 |      |       |       |     | 106.0 | 32.5 | 631.40 | 7.7 |
| E1L2-1                               | 1 | 15.0  | 0.8 | 6.7  | 20.8  | 30.0  | 0.1 | 1.0   | 2.1  | 19.74  | 1.0 |
| E1L2-2                               | 1 | 313.4 | 4.4 | 26.0 | 75.5  | 169.4 |     | 71.3  | 20.8 | 514.98 | 3.0 |
| E1L3-0                               | 1 |       | 0.4 |      | 122.9 |       |     |       |      |        |     |
| E1L3-01                              | 1 | 43.5  | 0.7 | 5.7  | 9.0   | 31.6  |     | 8.1   | 2.4  | 69.91  | 1.1 |
| E1L3-02                              | 1 | 43.9  | 0.5 | 8.3  | 11.6  | 35.9  | 0.0 | 9.7   | 2.3  | 81.62  | 1.3 |
| E1L4-0                               | 1 | 72.2  | 4.2 | 9.8  | 11.7  | 63.4  |     | 16.7  | 7.3  | 73.63  | 2.0 |
| E1L4-01                              | 1 | 41.6  | 3.7 | 5.2  | 6.8   | 50.4  |     | 7.0   | 3.3  | 35.07  | 1.0 |
| E1L4-1                               | 1 | 16.1  | 5.6 | 2.9  | 4.1   | 36.3  | 0.0 | 1.9   | 4.6  | 14.74  | 1.7 |
| E1L4-11                              | 1 | 13.0  | 5.6 | 2.7  | 4.8   | 43.9  | 0.0 | 1.7   | 3.1  | 6.87   | 1.4 |
| E1L5-0                               | 1 | 65.5  | 1.9 | 9.7  | 15.8  | 41.1  | 0.1 | 8.5   | 12.9 | 44.47  | 3.4 |
| E1L5-1                               | 1 | 45.8  | 0.5 | 7.7  | 11.1  | 25.7  | 0.1 | 7.2   | 6.5  | 36.33  | 2.9 |
| E2L1-0                               | 2 | 12.5  | 3.1 | 15.0 |       | 47.7  | 0.1 | 1.2   | 1.0  | 12.53  | 1.0 |
| E2L1-1                               | 2 | 18.6  | 2.9 | 4.0  | 3.7   | 19.3  | 0.1 | 1.6   | 0.4  | 29.90  | 0.8 |
| E2L2-0                               | 2 | 19.6  | 1.1 | 4.2  | 3.1   | 12.7  | 0.1 | 2.6   | 0.3  | 44.05  | 1.3 |
| E2L3-0                               | 2 | 12.5  | 2.1 | 6.2  | 4.9   | 16.5  | 0.0 | 1.2   | 0.4  | 22.05  | 1.4 |
| E2L4-0                               | 2 | 14.1  | 1.4 | 10.0 | 20.4  |       | 0.0 | 0.9   |      | 14.40  |     |
| E2L5-0                               | 2 | 30.8  | 2.1 |      | 10.2  | 34.0  |     |       | 0.4  |        | 0.9 |
| E2L5-1                               | 2 | 11.6  | 1.9 | 6.0  | 4.0   | 23.0  | 0.3 | 1.2   | 0.2  | 15.56  | 0.8 |
| E2L6-0                               | 2 | 9.3   | 0.0 | 2.8  | 1.9   | 10.3  | 0.0 | 1.3   | 0.1  | 2.83   | 0.3 |
| E2LN1-0                              | 2 |       | 0.8 | 5.7  | 9.0   | 29.7  | 0.1 | 1.7   | 1.0  | 35.01  | 1.4 |
| E2LN2-0                              | 2 | 22.4  | 0.0 | 6.1  | 4.8   | 17.8  | 0.0 | 0.7   | 0.2  | 8.70   | 0.4 |
| E2LN3-0                              | 2 | 10.3  | 1.1 | 2.0  | 5.7   | 13.0  | 0.0 | 0.3   | 0.4  | 2.51   | 0.8 |
| E2LN3-1                              | 2 | 16.3  | 1.4 | 4.4  | 6.4   | 18.1  | 0.1 | 0.7   | 0.5  | 6.21   | 1.0 |
| E2LN3-2                              | 2 | 16.7  | 2.4 | 3.8  | 6.2   | 20.3  | 0.2 | 0.6   | 0.6  | 8.58   | 1.2 |
| E3L1-0                               | 3 | 25.0  | 0.1 | 5.0  | 10.5  | 15.1  |     | 1.7   | 0.5  | 41.00  | 0.4 |
| E3L2-0                               | 3 | 35.3  | 1.1 | 7.4  | 4.8   | 11.2  | 0.0 | 2.9   | 0.1  | 46.82  | 0.2 |
| E3L2-1                               | 3 | 44.0  | 0.9 | 5.0  | 3.4   | 15.3  |     | 4.3   | 0.3  | 70.10  | 0.4 |
| E3L3-0                               | 3 | 29.2  | 0.5 | 8.1  | 8.6   | 20.4  | 0.0 | 3.8   | 0.4  | 36.00  | 1.5 |
| E3L3-01                              | 3 | 22.5  | 0.9 |      | 8.6   | 17.0  | 0.0 | 3.9   |      | 29.28  |     |
| E3L4-0                               | 3 | 12.5  | 0.2 | 3.2  | 6.1   | 16.7  | 0.1 | 0.7   | 0.2  | 10.05  | 0.6 |
| E3L4-2                               | 3 | 9.0   | 0.6 | 2.0  | 2.6   | 14.4  | 0.0 | 0.5   | 0.2  | 5.64   | 0.8 |
| E3L5-0                               | 3 | 18.6  | 6.6 | 2.9  | 2.4   | 10.5  |     | 1.1   | 0.2  | 18.06  | 0.3 |
| E3L5-1                               | 3 | 14.8  | 0.0 | 2.3  | 2.6   | 17.7  | 0.0 | 0.6   | 0.2  | 12.94  | 0.4 |
| E3L5-2                               | 3 | 27.6  | 2.8 | 2.6  | 2.4   | 15.1  |     | 1.9   | 0.2  | 29.56  | 0.3 |
| E3L5-3                               | 3 | 42.2  | 3.8 | 5.6  | 4.1   |       | 0.0 | 3.4   | 0.3  | 60.75  | 0.6 |
| E3L5-4                               | 3 | 39.3  | 3.2 | 4.2  | 3.7   | 31.7  | 0.1 | 3.2   | 0.4  | 69.33  | 0.6 |
| <b>Number of<br/>rejected points</b> |   | 9     | 5   | 10   | 6     | 11    | 30  | 8     | 9    | 15     | 7   |
